# Supplementary material for: Comparison of clinical outcomes between luminal invasive ductal carcinoma and luminal invasive lobular carcinoma
Source: BMC Cancer. 2016 Mar 25;16:248. doi: 10.1186/s12885-016-2275-4 (PMC4807554; doi:10.1186/s12885-016-2275-4)
Supplement: Additional file 1: — Dataset supporting the conclusions of this article. (XLSX 94 kb) [file 12885_2016_2275_MOESM1_ESM.xlsx]

## Sheet: Sheet1
dfs	dfstime	pathology(1:IDC,2:ILC)	tumor size(1:<2,2:2<t<5,3:>5)	lymph node status(0:negative,1:positive)	age(0:<50,1:>50)	menopause(0:pre,1:post)	hormonal therapy(0:-,1:+)	chemotherapy(0:-,1:+)	radiotherapy(0:-,1:+)	os	ostime	grade
1	21	2	3	1	0	0	1	1	1	1	53
0	119	1	1	0	1	1	1	0	0	0	119	2
0	120	1	1	0	1	1	1	0	0	0	120	2
0	110	1	2	1	1	1	1	1	0	0	110	2
0	119	1	1	1	0	0	1	1	1	0	119	2
0	119	1	2	1	1	1	1	1	0	0	119
1	114	1	1	0	1	1	0	0	0	1	114	2
0	113	1	2	1	0	1	1	1	1	0	113
0	31	1	2	0	1	0	1	1	1	0	31	3
0	27	1	1	0	0	0	1	0	0	0	27	2
0	118	1	1	1	0	0	1	1	0	0	118	1
1	1	1	2	1	1	1	1	1	1	1	41	3
0	120	1	1	0	0	0	1	0	0	0	120	2
0	121	1	1	1	0	0	1	1	0	0	121	2
0	120	1	1	0	0	0	1	0	1	0	120	1
0	25	1	1	1	0	0	1	1	1	0	25
0	25	1	1	0	1	1	1	0	0	0	25
0	24	1	2	1	1	0	1	1	0	0	24	2
0	115	1	1	1	1	1	1	1	1	0	115	3
0	12	1	1	0	1	1	0	0	0	0	12	1
0	109	1	1	0	0	0	1	1	1	0	109	2
1	91	1	1	0	0	0	1	0	1	1	91	1
0	109	1	1	0	1	0	1	0	0	0	109	1
0	108	1	2	0	1	1	1	0	0	0	108
0	115	1	1	0	1	1	1	0	0	0	115	2
0	115	1	2	0	0	0	1	0	0	0	115
0	117	1	1	1	1	0	1	1	0	0	117	2
0	114	1	1	0	0	0	1	0	0	0	114	2
0	108	1	1	1	1	1	0	1	0	0	108	2
0	105	1	1	0	0	0	1	0	0	0	105	2
0	20	1	1	0	1	1	1	0	0	0	20
0	119	1	1	0	0	0	1	0	0	0	119	2
0	120	1	1	1	0	0	1	1	0	0	120	2
1	74	1	2	1	1	1	0	1	0	1	85	2
0	119	1	1	0	1	1	0	0	0	0	119	1
0	120	1	1	0	1	1	1	0	0	0	120	2
0	120	1	1	0	1	1	1	0	1	0	120
0	109	1	1	0	1	0	0	0	0	0	109	1
1	29	1		0	1	1	0	0	0	0	120	2
0	120	1	1	0	1	1	1	0	1	0	120	1
1	15	1	2	1	0	0	1	1	0	1	48	2
1	29	1	1	0	1	1	0	0	0	0	111	2
0	110	1	2	1	0	0	1	0	0	0	110	2
0	108	2	1	0	0	0	1	0	0	0	108	2
0	114	1	1	1	0	0	1	1	0	0	114	2
0	107	1	1	0	1	1	1	1	1	0	107	2
1	26	1	1	1	1	1	1	1	0	1	87	2
0	117	1	2		0	0	0	1	0	0	117
0	108	1	1	0	1	1	1	0	1	0	108	2
0	59	1	1	0	1	1	0	0	0	0	59	2
1	30	1	1	0	0	0	0	0	0	0	76	2
0	111	1	1	1	1	1	1	1	0	0	111	2
0	120	1	1	0	0	0	0	0	1	0	120	2
0	122	2	2	1	1	1	1	1	0	0	122
0	119	1	1	1	1	1	1	1	0	0	119	2
1	53	1	1	0	0	0	1	0	0	1	102	2
1	16	1	1	1	0	0	1	1	0	0	23	2
1	60	1	2		1	0	1	0	0	1	60	2
0	108	1	1	0	0	0	1	0	0	0	108
1	120	1	2	1	1	1	1	1	1	0	123	1
1	85	1	1	1	1	1	1	1	0	1	114
0	82	1	1	0	1	1	0	0	0	0	82	1
0	84	1	2	1	1	1	1	0	0	0	84	2
1	37	1	2	1	0	0	0	0	0	1	37
0	119	1	1	0	0	0	1	0	0	0	119
0	119	1	1	0	0	0	1	0	0	0	119	2
0	19	1	1	0	1	1	1	0	0	0	19	2
0	119	1	1		0	0	0	0	1	0	119	1
0	94	1	1	0	0	1	0	0	0	0	94	1
0	117	1	1	0	1	1	0	0	0	0	117	1
0	16	1	1	0	0	1	0	0	0	0	16
0	109	1	1	0	1	1	1	0	0	0	109	2
0	108	1	1	1	1	1	1	1	0	0	108	1
0	119	1	1	1	1	0	1	1	0	0	119	2
0	108	1	1	0	1	0	1	0	0	0	108	1
0	16	1	1	0	0	1	0	0	0	0	16
0	108	1	1	0	1	0	1	0	0	0	108	3
0	115	2	2	0	1	1	1	0	0	0	115
0	117	1	1	0	0	0	1	0	1	0	117	3
0	108	1	1	0	1	1	1	0	0	0	108	1
0	117	1	1	0	1	1	0	0	0	0	117	2
1	73	1	2	0	1	1	1	0	0	1	73	2
0	107	1	1	0	0	0	1	0	1	0	107	1
0	107	1	1	0	1	1	1	0	0	0	107	2
0	107	1	1	0	1	1	0	0	1	0	107	1
0	108	1	1	1	0	0	1	1	0	0	108	3
0	1	1	1	0	0	0	0	0	0	0	1	1
0	108	1	1	0	1	1	1	1	1	0	108	3
1	17	1	2	1	1	1	1	1	0	1	79	2
0	89	1	1	1	1	1	1	0	0	0	89
0	119	1	1	0	0	0	1	0	0	0	119	1
0	108	2	1	1	1		1	1	0	0	108	2
1	88	1	2	0	1	0	1	0	0	0	119	1
0	119	1	1	0	1	1	1	0	1	0	119	2
0	119	1	2	1	1	1	1	1	0	0	119	2
0	119	1	2	0	1	1	1	0	0	0	119
0	98	1	2	0	0	0	1	0	0	0	98
0	4	2	2	0	0	0	1	0	0	0	4
0	121	1	1	0	1	0	1	0	1	0	121	1
1	9	1	2	0	0	0	1	1	1	0	55	3
0	120	1	1		0	0	1	0	0	0	120	2
0	59	1	1		1	1	0	0	0	0	59	1
0	34	1	1	1	1	0	1	1	0	0	34	2
0	116	1	1	1	1	0	1	1	0	0	116	2
0	109	1	1	0	1	0	1	0	0	0	109	1
0	116	1	1	0	0	0	1	1	0	0	116	2
0	105	1	1		0	0	1	0	0	0	105	1
0	115	1	2		0	0	1	0	0	0	115	2
0	40	1	1	0	1	0	1	0	0	0	40
1	118	1	1		1	1	1	0	0	0	118	1
0	114	1	2	0	1	1	1	0	0	0	114
0	20	1	1	0	0	0	0	1	0	0	20
1	104	2	2	1	0	1	1	1	0	1	104
0	112	1	1	0	0	0	1	0	0	0	112	2
0	55	1	2	0	1	1	1	0	0	0	55	2
0	31	1	1	0	0	0	1	1	0	0	31
0	119	1	1	1	1	1	1	1	0	0	119
1	23	1	2	0	1	1	1	1	0	1	87	2
1	97	1	2	0	1	1	1	0	0	0	126
0	122	1	1	0	1	1	0	0	0	0	122	2
0	38	1	3	0	0	0	1	0	0	0	38	3
0	29	1	2	0	0	0	1	0	0	0	29
0	99	1	1	0	1	1	1	0	0	0	99	2
0	108	1	1	1	1	1	1	1	1	0	108
0	109	1	2	0	0	0	1	1	1	0	109	1
0	96	1	2	0	1	0	1	1	0	0	96	2
1	58	1	2	1	1	0	1	1	0	1	61	2
0	74	1	1	0	1	1	1	0	0	0	74	2
0	20	1	2	0	1	1	1	1	1	0	20	2
0	21	1	2	1	0	0	1	1	1	0	21	1
0	107	1	1	0	1	0	1	0	1	0	107	2
0	107	1	2	0	0	0	1	1	1	0	107	2
0	17	1	1		0	0	0	0	0	0	17	1
0	110	1	2	1	0	0	1	1	1	0	110	3
0	108	1	1	0	1	1	1	0	0	0	108	2
0	108	1	1	0	1	1	1	0	0	0	108	1
0	108	1	1	0	0	0	0	0	0	0	108	2
0	107	1	1	0	0	0	1	0	1	0	107	2
0	109	1	2	0	0	0	1	1	0	0	109
0	19	1	1	0	0	0	0	0	0	0	19	1
0	110	1	1	0	1	1	1	0	0	0	110	2
0	106	1	2	0	0	0	1	0	0	0	106
0	109	1	2	0	1	0	1	0	0	0	109	2
0	111	1	2	1	1	1	1	1	0	0	111	3
0	18	1	2	0	0	0	1	0	0	0	18	2
1	100	2	1	0	0	0	0	1	0	0	110
0	53	1	1	1	1	1	1	0	0	0	53	2
0	2	1	2	1	1	1	1	0	0	0	2
0	107	1	1	1	0	0	1	1	1	0	107	2
0	109	1	1	0	0	0	1	0	0	0	109	2
0	111	1	1	0	0	0	0	0	1	0	111	2
0	4	1	2	1	1	1	0	1	0	0	4	3
0	105	1	1	0	1	0	1	0	1	0	105	2
0	113	1	1	0	1	1	1	0	1	0	113	2
1	88	1	1	0	1	0	1	1	0	0	114	2
0	3	1	1	0	1	1	1	0	0	0	3	3
0	15	1	2	0	1	1	1	0	0	0	15	2
0	107	1	1	0	0	0	1	0	0	0	107	2
0	107	1	2		0	0	1	0	0	0	107	1
0	21	1	1	0	0	0	1	0	1	0	21	3
0	108	1	1	1	1	0	1	1	0	0	108
1	49	1	1	1	0	0	0	1	1	0	86	3
0	108	1	1	0	1	1	1	0	1	0	108	1
1	8	1	3	1	1	1	1	1	1	0	18	2
0	104	1	1	1	0	0	1	1	0	0	104	2
0	17	1	1	0	1	1	1	0	0	0	17	2
0	107	1	1	0	1	1	1	0	0	0	107
0	107	1	2	0	1	1	1	1	0	0	107	2
0	100	1	1	0	1	1	1	0	1	0	100
0	3	1	1	0	1	1	0	0	0	0	3	3
0	114	1	1	0	1	0	1	0	0	0	114
0	109	1	1	1	1	1	1	1	0	0	109	2
0	108	1	2	1	1	0	0	1	0	0	108
0	1	1	3	0	1	0	1	0	0	0	1	2
0	114	1	3	1	1	1	1	1	0	0	114	2
0	108	1	2	0	0	0	1	1	0	0	108
0	110	1	1	0	1	0	1	0	1	0	110	1
0	56	1	1		1	1	1	1	0	0	56	2
0	108	1	1	0	1	1	1	0	1	0	108
0	110	1	1	0	0	0	1	0	1	0	110	2
0	107	1	2	1	0	0	1	1	1	0	107	3
1	42	1	1	1	0	0	0	1	0	0	68	2
1	72	1	1	0	0	0	0	0	1	0	112	1
0	24	1	1	0	0	0	1	0	1	0	24	2
0	16	1	1	0	0	0	1	0	0	0	16	2
0	101	1	1	0	0	0	1	0	1	0	101	2
1	6	1	2	1	0	0	1	1	1	1	15	2
0	113	1	1	1	0	0	0	1	1	0	113
0	48	1	1	0	1	1	1	0	0	0	48	2
0	108	1	1	0	0	0	1	0	0	0	108	2
0	3	1	2	0	1	1	0	0	0	0	3	2
1	60	1	1	0	1	1	1	1	0	0	110	2
0	108	1	2	0	1	1	0	0	0	0	108
0	14	1	1		1	1	0	1	0	0	14	2
0	108	1	1		0	0	1	0	1	0	108
0	107	1	1	0	1	0	1	0	0	0	107
0	108	1	1	0	1	1	1	0	0	0	108	2
0	111	1	1	0	0	0	1	0	0	0	111	3
0	108	1	1	0	1	1	1	0	1	0	108	1
0	96	1	2	1	0	0	1	1	1	0	96	2
1	92	2	2	1	0	0	1	1	0	0	105	1
0	88	1	1	0	1	1	1	0	1	0	88	1
0	12	1	1	0	1	1	1	1	0	0	12	2
0	108	1	1	1	0	0	1	1	0	0	108	2
0	105	1	1	0	0	0	0	0	1	0	105	1
0	72	1	2	1	1	1	1	1	0	0	72	2
0	106	1	1		0	0	1	0	0	0	106	1
0	108	1	1	0	1	1	1	0	1	0	108	2
0	67	2	1	1	1	1	1	1	0	0	67
0	12	1	2		1	0	1	1	0	0	12	3
0	106	1	1		0	0	1	0	0	0	106	3
0	7	1	2	0	0	0	1	0	0	0	7	2
0	72	1	1	0	0	0	0	0	1	0	72	1
0	107	1	1	1	0	0	1	1	0	0	107	3
0	104	1	1	1	0	0	1	1	0	0	104	2
1	29	1	1	0	1	0	1	0	0	0	110
0	108	1	1	0	1	1	1	0	0	0	108	3
0	102	1	1	0	1	1	1	0	1	0	102	2
0	76	1	1	0	1	1	0	0	0	0	76	2
0	108	1	1	0	0	0	1	0	0	0	108	2
0	107	1	1	0	1	1	1	0	1	0	107	2
0	49	1	1	0	1	1	1	0	0	0	49	2
0	105	1	1		0	0	1	1	1	0	105	2
0	12	1	1	0	0	0	1	0	0	0	12	2
0	107	1	1	0	1	0	0	0	1	0	107	1
0	110	1	1	1	0	0	1	1	0	0	110
0	107	1	1	0	1	0	1	1	0	0	107	1
0	109	1	1	0	1	1	1	1	1	0	109	2
0	103	1	1	0	0	0	1	0	0	0	103	2
0	107	1	1	0	1	1	0	0	1	0	107	2
0	108	1	1	0	0	0	1	0	1	0	108
0	103	1	1	0	1	1	1	0	1	0	103
0	107	1	1	0	1	1	1	0	1	0	107	2
0	107	1	1		1	1	1	0	1	0	107	2
0	98	1	1	1	1	1	1	0	1	0	98	2
0	107	1	1	0	1	1	1	0	1	0	107	2
0	78	1	1	0	0	0	1	0	1	0	78	2
0	107	1	1	0	1	1	1	0	1	0	107	2
0	97	1	1		0	1	1	0	0	0	97	2
0	11	1	1	0	0	0	1	0	1	0	11	2
0	95	1	1	0	1	1	1	0	1	0	95	3
0	95	1	1	0	1	1	1	0	0	0	95	1
0	9	1	1	0	1	1	1	0	0	0	9	2
1	43	1	1	0	0	0	1	1	1	0	107	3
0	107	1	1	0	0	0	1	1	0	0	107	3
0	95	1	1	1	1	0	1	1	1	0	95	2
0	79	1	1	0	1	0	1	0	1	0	79	2
0	97	1	1	0	1	0	1	0	0	0	97	1
0	96	1	1	0	1	1	1	0	0	0	96	1
1	19	1	1	1	1	1	1	1	0	0	62	3
0	95	1	1	0	0	0	1	0	0	0	95	2
0	72	1	1	0	1	0	1	0	1	0	72	2
0	9	1	1	0	0	0	1	0	1	0	9	2
1	97	1	2		1	1	1	1	1	0	105	2
0	9	1	1	1	1	1	1	1	1	0	9
0	94	1	1	0	0	0	1	0	1	0	94	2
1	11	1	1	0	1	0	1	0	0	0	95	2
0	95	1	2	1	1	1	1	0	1	0	95	2
0	97	1	1	0	1	1	0	0	1	0	97	1
0	60	1	1	1	0	0	1	0	0	0	60	1
0	95	1	2	0	0	0	0	1	1	0	95	3
1	55	1	1	1	1	1	1	1	1	1	57	3
1	40	1	2		0	0				1	83	3
0	102	1	1	1	1	1	1	1	1	0	102	1
0	8	1	1		1	1	1	0	1	0	8	2
0	94	1	1	0	0	0	1	1	1	0	94	3
0	96	1	1	1	0	0	1	1	0	0	96	2
0	8	1	2	0	1	0	1	0	0	0	8	2
0	105	1	1	0	1	1	0	0	0	0	105	1
0	105	2	1	0	1	1	0	0	0	0	105	1
0	104	1	1	1	1	1	1	0	0	0	104	1
1	4	1	2	1	1	1	0	1	1	1	90	2
0	108	2	1	0	1	1	1	0	0	0	108
1	90	2	2	1	1	0	1	1	1	0	113	2
0	47	1	1	0	1	1	0	0	0	0	47	2
1	42	1	2	0	0	0	1	0	1	0	58
0	108	1	1	0	1	1	0	0	1	0	108	1
0	109	1	1	0	1	0	1	0	0	0	109	2
0	115	1	1	1	1	0	1	1	1	0	115	1
0	60	1	1	0	1	1	1	0	0	0	60	2
0	44	1	2		1	1	1	1	0	0	44	2
0	107	1	1	0	0	0	1	0	1	0	107
0	95	1	1	0	1	1	0	0	1	0	95	1
0	108	1	1	0	0	0	1	0	1	0	108	2
0	106	1	1	0	1	1	0	0	0	0	106
0	81	1	2	0	1	1	1	0	0	0	81	2
0	97	1	3	0	1	1	1	0	0	0	97	1
0	1	1	1	0	0	0	0	0	1	0	1	1
0	81	1	1	1	0	0	1	1	0	0	81	2
0	96	1	2	0	0	0	1	1	0	0	96	3
0	7	1	2	1	0	0	1	1	0	0	7	3
1	54	2	3	1	1	1	1	0	0	0	91	3
0	95	1	1	1	0	0	1	1	0	0	95	3
0	94	1	1	0	0	0	1	0	0	0	94	2
1	39	1	3	1	1	1	1	1	1	0	104	2
0	95	1	1	0	0	0	1	0	0	0	95	2
0	98	1	1	0	0	0	0	0	1	0	98	1
0	102	1	2	1	0	0	1	1	0	0	102	2
0	50	1	2	1	1	1	1	0	0	0	50	2
0	96	1	1	0	0	0	1	0	1	0	96	2
0	96	1	3	1	1	0	1	1	1	0	96	2
0	91	1	1	0	1	0	0	0	0	0	91	1
0	103	1	1	0	1	1	0	0	0	0	103	1
0	98	1	1	0	1	1	1	0	0	0	98	1
1	33	1	1	0	1	1	1	0	0	1	101	2
0	97	1	1	0	1	0	1	0	1	0	97	1
0	6	1	2	0	1	1	1	0	0	0	6	2
0	102	1	1	0	1	1	1	0	0	0	102	2
1	0	1	3	1	1	1	0	1	1	1	53	2
0	96	1	2	0	1	1	1	0	0	0	96	2
0	91	1	1	1	0	1	1	1	0	0	91	3
0	6	1	1	1	1	1	1	1	1	0	6	2
1	95	1	1	0	1	1	0	0	0	0	101	1
0	96	1	1	0	1	0	1	1	0	0	96	1
0	44	2	2	1	0	0	1	1	1	0	44	2
0	97	1	1	0	1	1	1	0	0	0	97	2
0	95	1	1	0	1	0	1	0	1	0	95	3
0	96	1	1	1	0	0	1	1	1	0	96	2
0	15	1	2	0	0	0	1	1	0	0	15	2
0	93	1	1	0	0	0	1	0	0	0	93	2
1	71	2	1	1	0	0	1	1	1	1	90	2
0	96	1	2	1	0	0	1	1	0	0	96	1
0	96	1	1	0	1	0	1	0	0	0	96	2
0	95	1	2	1	0	0	1	1	0	0	95	2
0	5	1	1	0	1	0	1	0	1	0	5	1
0	97	1	1	0	1	0	1	0	1	0	97	3
0	96	1	1	0	0	0	1	0	1	0	96	2
0	96	1	1	0	0	0	1	0	0	0	96	2
0	5	1	1	0	1	1	1	0	1	0	5	2
0	95	1	1	0	1	1	1	1	0	0	95	2
0	96	1	1	1	1	1	1	1	0	0	96	2
0	97	1	1	0	1	0	1	0		0	97	2
0	5	1	1	0	0	0	1	0	0	0	5	1
1	77	2	1	0	1	1	1	0	1	0	99	1
0	96	1	1	0	1	1	1	0	0	0	96	2
0	98	1	1	0	1	1	1	0	1	0	98	2
0	99	1	1	0	1	1	1	0	1	0	99	2
0	96	1	1	1	1	1	1	0	0	0	96	2
0	1	1	1	1	0	0	1	1	0	0	1	2
1	50	1	1	1	1	0	1	1	1	0	100	3
0	98	1	1	0	1	1	1	0	0	0	98	1
0	97	1	1	0	0	0	1	1	1	0	97	3
1	48	1	2		1	1	1	1	1	0	99	3
0	93	1	2	1	1	1	1	1	1	0	93	2
0	97	1	1	0	0	0	1	0	0	0	97	2
0	3	1	1	0	1	1	1	0	1	0	3	2
0	95	1	1	0	0	0	1	1	0	0	95	2
0	95	1	1	0	0	0	1	0	1	0	95	2
0	61	1	2	1	1	1	1	1	1	0	61	2
0	98	1	2	1	0	0	1	1	1	0	98	2
0	3	1	2	1	1	1	1	1		0	3	2
0	97	1	1	1	1	1	1	0	1	0	97	2
0	89	1	3	0	1	1	1	0	1	0	89	2
0	3	1	2	0	1	1	1	0	0	0	3
0	50	1	1	0	1	1	1	0	0	0	50	1
0	95	1	1	0	0	1	1	1	1	0	95	3
0	2	1	1	1	1	1	1	0	0	0	2	1
1	60	1	1	1	1	0	1	1	0	0	98	2
0	97	1	1	0	1	1	1	0	0	0	97	2
0	55	1	2	1	1	1	0	0	0	0	55	1
0	96	1	2	1	1	1	1	1	0	0	96	2
0	95	1	1	0	1	1	0	0	1	0	95	2
0	97	1	1	0	1	1	1	0	1	0	97	2
0	95	1	1	0	1	1	0	0	0	0	95	3
0	74	1	1	0	1	1	1	0	0	0	74	2
0	94	1	1	0	1	1	1	0	1	0	94	2
0	1	1	1	0	0	0	1	0	0	0	1	2
0	70	1	1	1	1	1	1	0	0	0	70	2
0	95	1	1	0	1	1	1	0	0	0	95	1
0	88	1	2	0	1	1	1	1	0	0	88	2
0	94	1	1	0	1	1	1	0	1	0	94	1
0	58	1	1	0	1	1	1	1	1	0	58	2
0	95	1	1	1	0	0	1	1	1	0	95	2
0	52	2	1	0	1	0	1	0	0	0	52	1
0	0	1	2	0	0	0	1	1	0	0	0	2
0	96	1	2	0	1	1	1	0	0	0	96	3
0	2	1	2	0	1	1	1	1	1	0	2	1
1	96	1	2	1	1	1	1	1	0	0	96	2
0	85	1	2	1	1	1	1	1	0	0	85	3
0	96	1	1	0	1	1	0	0	0	0	96	2
0	96	1	1	0	1	1	1	1	0	0	96	3
0	95	1	2	0	0	0	1	0	1	0	95	3
0	84	1	1	0	0	0	1	0	1	0	84	2
0	85	1	1	0	1	1	1	0	0	0	85	3
0	95	2	2	0	1	1	1	0	0	0	95	3
0	95	1	1	0	1	1	1	0	1	0	95	1
0	94	1	1	0	1	0	0	0	1	0	94	2
0	90	1	1	0	1	1	1	0	0	0	90	1
0	86	1	2	1	1	1	1	1	0	0	86	3
1	36	1	1	1	1	1	1	0	0	1	84	2
0	84	1	2	1	0	0	1	1	0	0	84	2
0	84	1	1	1	1	0	1	1	1	0	84	2
0	90	1	1	0	0	0	1	0	0	0	90	1
0	83	1	1	0	1	1	1	1	0	0	83	2
0	95	2	2	0	1	0	1	1	1	0	95	1
0	86	1	2	1	1	0	1	1	1	0	86	2
0	86	1	1	1	1	1	1	1	0	0	86	2
0	85	1	1	0	1	1	1	1	0	0	85	1
0	90	1	1	1	1	1	1	0	0	0	90	1
0	85	1	1	0	0	0	0	1	0	0	85	3
0	84	1	1	0	0	0	1	0	1	0	84	2
0	83	1	1	0	1	1	1	0	0	0	83	2
0	84	1	1	1	0	0	1	1	0	0	84	2
0	93	1	1	0	1	0	1	1	1	0	93	1
0	84	1	1	0	1	1	1	0	0	0	84	1
0	93	1	1	0	1	1	1	1	1	0	93	1
0	86	1	1	0	1	1	1	0	1	0	86	2
0	72	1	1	0	1	1	1	0	0	0	72	1
0	89	1	1	1	0	0	1	1	0	0	89	2
0	86	1	1	0	1	1	1	0	1	0	86	1
0	92	1	1	0	0	0	1	1	0	0	92	2
1	51	1	3	1	1	1	1	1	0	0	94	2
0	84	1	1	0	1	1	1	0	0	0	84	1
0	91	1	1	0	0	0	1	1	0	0	91	2
0	84	1	2	0	1	1	1	1	0	0	84	3
0	90	1	1	0	1	1	1	1	1	0	90	2
0	84	1	1	0	0	0	1	0	1	0	84	1
0	83	1	1	0	1	1	0	0	1	0	83	1
1	4	1	1	0	0	0	1	1	0	0	37	2
0	84	1	1	0	1	1	1	0	1	0	84	2
0	90	1	2	1	1	1	1	1	0	0	90	2
0	84	1	1	0	0	0	1	0	0	0	84	2
0	54	1	1	0	1	1	0	0	0	0	54	1
0	1	1	2	0	0	0	1	1	1	0	1	2
0	84	1	1	0	1	1	1	1	0	0	84	3
0	66	1	1	0	1	1	1	0	0	0	66	2
0	60	1	1	0	1	0	1	0	1	0	60	2
0	88	1	1	0	1	1	1	0	1	0	88	1
0	85	1	1	0	0	0	1	1	0	0	85	3
0	91	1	1	0	1	1	1	0	0	0	91	1
1	58	1	1	0	1	1	1	0	0	0	82	1
0	95	1	1	0	0	0	1	1	1	0	95	3
0	96	1	1	1	0	0	1	1	0	0	96	3
0	60	1	2	0	1	1	1	1	0	0	60	3
0	21	1	3	1	1	1	1	1	1	0	21	3
0	3	1	1	0	1	1	1	0	1	0	3	2
0	97	1	1	1	1	0	1	1	0	0	97	2
0	95	1	1	1	1	1	1	1	1	0	95	2
0	96	1	1	0	1	1	1	0	1	0	96	3
0	88	1	1	1	1	1	1	1	1	0	88	2
0	95	1	1	0	1	1	1	0	1	0	95	1
0	83	1	1	0	0	0	1	0	1	0	83	1
0	85	1	2	1	0	0	1	1	0	0	85	3
0	88	1	2	0	0	0	1	1	0	0	88	2
0	63	1	2	1	0	0	1	1	0	0	63	3
0	83	1	1	0	0	0	1	0	0	0	83	2
0	84	1	1	0	1	1	1	0	1	0	84	2
0	89	1	2	1	1	0	1	1	1	0	89	2
0	85	2	1	1	1	0	1	1	1	0	85	2
0	84	1	1	0	0	0	1	0	0	0	84	2
0	86	1	2	1	0	0	1	1	1	0	86	2
0	83	1	1	1	1	0	1	1	1	0	83	2
0	84	1	2	1	1	1	1	1	1	0	84	3
0	83	1	1	1	1	0	1	1	1	0	83	1
0	86	2	1	0	1	1	1	0	0	0	86	1
0	83	1	2	0	0	0	1	0	0	0	83	1
0	84	1	1	0	0	0	1	0	1	0	84	2
0	65	1	1	1	1	0	1	1	0	0	65	2
0	73	1	1	0	0	0	1	1	1	0	73	2
0	81	1	1	1	0	0	1	1	0	0	81	2
1	23	1	2	1	0	0	1	1	1	1	92	3
1	45	1	2	1	0	0	1	1	1	1	82	2
0	84	1	2		0	1	1	1	0	0	84	2
0	84	1	1	0	1	1	0	0	1	0	84	1
0	84	1	1	0	1	1	1	0	1	0	84	2
0	91	1	3	1	0	0	1	1	1	0	91	2
0	88	1	1	0	0	0	1	0	1	0	88	2
0	84	1	1	1	1	1	1	0	1	0	84	2
0	84	1	1	0	1	1	1	0	1	0	84	2
0	84	1	1	1	0	0	1	1	0	0	84	2
0	84	1	1	0	0	0	0	0	1	0	84	2
0	81	1	2	1	1	1	1	1	0	0	81	3
0	83	1	1		1	1	1	0	0	0	83	2
0	46	1	1	0	1	1	1	0	0	0	46	2
0	87	1	1	0	1	1	1	1	0	0	87	2
1	23	1	1	1	0	0	1	1	0	1	53	3
0	87	1	1	0	0	0	1	1	1	0	87	1
0	83	1	1	0	0	0	1	1	1	0	83	3
0	84	1	1	0	1	1	1	0	1	0	84	3
0	87	1	1	1	1	1	1	1	1	0	87	3
0	83	1	1	0	0	0	1	1	0	0	83	2
1	28	2	2	1	1	1	1	1	1	1	47	1
0	83	1	1	0	1	1	0	0	1	0	83	1
0	83	1	2	0	1	0	1	1	0	0	83	2
0	83	1	2	0	1	0	1	1	0	0	83	2
0	43	1	1	0	1	1	1	1	1	0	43	3
0	85	1	1	0	1	0	1	0	1	0	85	2
1	27	1	1	1	1	1	1	1	1	1	55	2
0	83	1	1	0	1	0	1	0	0	0	83	2
0	84	1	1	0	1	1	0	0	0	0	84	1
0	57	1	1	0	1	1	1	0	0	0	57	3
0	85	1	1	0	1	1	1	0	1	0	85	2
0	83	1	1	1	0	0	1	1	1	0	83	2
0	83	1	1	0	0	0	1	0	0	0	83	2
0	83	1	2	0	1	1	1	1	0	0	83	2
0	84	2	2	0	1	1	1	0	0	0	84	1
0	84	1	1	0	1	1	1	0	0	0	84	2
0	79	1	2	1	1	0	1	1	0	0	79	3
1	33	1	2	1	1	0	1	1	1	1	59	3
0	78	1	1	0	0	0	1	0	0	0	78	2
0	81	1	2		1	1	1	1	1	0	81	2
1	21	1	3	1	1	1	1	1	1	0	83	3
0	74	1	1		1	1	1	0	0	0	74	2
0	78	1	1	1	1	1	1	1	0	0	78	2
1	43	1	2	1	0	0	1	1	0	0	75	1
0	77	1	2	0	1	1	1	0	0	0	77	2
0	71	2	1	0	1	1	1	0	1	0	71	1
0	79	1	1	0	0	0	0	0	0	0	79	1
0	70	1	2	0		1	1	0	1	0	70	2
0	73	1	1	0	0	0	1	0	0	0	73	2
0	70	1	1	0	0	0	1	1	1	0	70	3
0	84	1	1	0	1	1	0	0	1	0	84	1
0	86	1	1	0	1	1	1	0	0	0	86	2
0	81	1	3	1	0	0	1	1	1	0	81	2
0	84	1	1	0	1	1	0	0	1	0	84	1
0	85	1	2	1	1	1	1	1	1	0	85	1
0	83	1	3	0	1	0	1	1	0	0	83	2
0	84	1	1	0	1	1	1	0	1	0	84	1
0	81	1	1	0	0	0	0	0	1	0	81	2
1	17	1	2	1	1	1	1	1	1	1	49	3
0	89	1	2	1	1	1	1	1	0	0	89	3
0	90	1	1	0	1	0	0	0	1	0	90	1
0	83	1	2	0	0	0	1	1	0	0	83	1
0	83	1	1	0	1	1	1	0	1	0	83	1
0	84	1	1	0	1	1	1	0	1	0	84	2
0	84	1	1	1	1	1	1	1	0	0	84	2
0	88	1	1	1	1	1	1	1	0	0	88	2
0	81	1	1	1	1	1	1	1	1	0	81	3
0	83	1	1	0	0	0	1	0	1	0	83	1
0	85	2	1	1	0	0	1	1	0	0	85	1
0	84	1	2	0	1	1	1	0	1	0	84	1
0	83	1	1	0	0	0	1	0	0	0	83	2
0	83	1	1	0	0	0	0	0	1	0	83	1
0	83	1	1	0	1	0	1	0	0	0	83	1
0	81	1	3	0	1	1	1	1	0	0	81	1
0	79	1	1	0	1	1	1	1	1	0	79	3
0	84	1	1	0	1	1	1	0	1	0	84	2
0	76	1	2	1	0	0	1	1	0	0	76	2
0	83	2	2	0	1	1	1	0	0	0	83	1
0	75	2	1	1	1	1	1	1	1	0	75	1
0	61	2	1	0	0	0	1	0	1	0	61	1
0	73	1	1	1	1	1	1	0	0	0	73	3
1	51	1	1	1	0	0	1	1	1	0	54	2
0	79	1	1	0	1	1	0	0	0	0	79	1
0	81	1	1	0	1	1	1	0	1	0	81	1
0	72	1	2	0	0	0	1	1	0	0	72	2
0	81	1	3	1	1	1	1	1	0	0	81	2
0	81	1	1	1	0	0	1	1	0	0	81	1
1	13	1	1	1	1	1	1	1	0	0	80	2
0	77	1	1	0	0	0	1	1	0	0	77	2
0	79	1	2	1	1	1	1	1	0	0	79	3
0	12	1	1	1	0	0	1	1	1	0	12	2
0	83	1	2	0	1	1	1	1	1	0	83	3
1	37	1	1	0	0	0	1	1	0	0	88	2
0	84	1	1	1	1	1	1	1	1	0	84	3
0	73	1	1	0	0	0	1	0	1	0	73	1
0	84	1	1	1	0	0	1	1	0	0	84	3
0	89	1	1	1	1	1	1	1	1	0	89	2
1	92	1	1	1	0	0	0	1	1	0	92	2
0	85	1	1	0	1	1	1	0	0	0	85	1
1	91	1	2	1	1	1	1	0	0	1	91	2
0	86	1	1	1	0	0	1	1	0	0	86	2
0	84	1	1	0	0	0	1	0	0	0	84	1
0	58	1	1	1	1	1	1	0	0	0	58	2
0	82	1	1	0	0	0	1	0	1	0	82	1
0	85	1	1	1	1	1	1	1	0	0	85	3
0	61	1	1	1	0	0	1	1	1	0	61	2
0	88	1	1	0	1	0	1	0	1	0	88	2
0	59	1	1	0	1	0	1	1	0	0	59	1
0	59	2	2	0	1	0	1	1	0	0	59	2
0	86	1	1	0	0	0	1	0	1	0	86	2
0	83	1	1	0	1	1	1	0	1	0	83	2
0	87	1	2	1	0	0	1	1	1	0	87	2
0	88	1	1	1	1	0	1	1	1	0	88	2
0	82	1	1	0	1	1	1	0	1	0	82	1
0	55	1	1	0	0	0	1	0	1	0	55	2
0	83	1	1	0	1	0	1	1	1	0	83	2
0	84	1	2	0	1	1	1	1	1	0	84	3
0	83	1	2	0	0	0	1	1	1	0	83	2
0	83	1	1	0	0	0	1	0	0	0	83	1
0	81	1	1	1	1	0	1	1	1	0	81	2
0	83	1	1	1	0	0	1	1	0	0	83	2
0	81	1	1	0	1	1	1	0	0	0	81	1
1	44	1	1	0	1	1	0	0	0	1	81	2
0	64	1	1	0	1	0	1	1	1	0	64	2
0	74	1	1	0	0	0	0	0	0	0	74	2
0	83	1	1	0	1	1	1	0	1	0	83	2
0	73	1	1	0	0	0	1	0	0	0	73	2
0	79	1	1	1	1	1	1	0	0	0	79	3
0	82	1	1	0	0	0	0	0	1	0	82	1
0	74	1	1	0	0	0	1	0	1	0	74	1
0	81	1	1	0	1	1	1	0	1	0	81	1
0	75	1	1	0	0	0	1	0	0	0	75	1
0	50	1	1	0	1	1	1	0	1	0	50	3
0	26	2	1	0	0	0	1	1	0	0	26	1
0	80	1	1	0	1	1	0	1	0	0	80	2
0	78	1	1	0	1	1	1	0	0	0	78	3
0	79	1	1	0	1	1	1	0	0	0	79	3
0	84	1	1	0	0	0	1	0	1	0	84	2
0	54	1	2	0	0	0	1	1	0	0	54	2
0	81	1	1	0	1	1	0	0	0	0	81	2
0	84	1	1	1	1	1	1	1	1	0	84	1
0	59	1	3	1	1	1	1	1	1	0	59	1
0	85	1	1	0	1	1	1	0	1	0	85	2
1	19	1	2	1	1	0	1	0	0	1	39	3
0	90	1	2	1	1	1	1	1	0	0	90	2
0	90	1	2	1	1	1	1	1	1	0	90	2
0	90	1	1	0	1	1	1	0	1	0	90	3
0	84	1	1	0	1	1	0	0	1	0	84	1
0	2	2	2	0	0	0	1	0	0	0	2	2
0	48	1	1	0	1	1	1	0	1	0	48	2
0	85	1	1	0	0	0	1	0	1	0	85	2
0	88	1	2	1	1	1	1	1	0	0	88	2
0	60	2	1	0	0	0	1	0	0	0	60	2
0	79	1	1	0	0	0	1	1	1	0	79	2
0	85	1	2	1	1	0	1	1	0	0	85	2
0	83	1	1	0	1	1	1	0	0	0	83	2
0	83	1	2	0	1	1	1	0	0	0	83	1
0	83	1	1	0	0	0	0	0	0	0	83	2
1	39	1	2	0	1	1	1	1	1	1	75	3
0	28	1	1	1	0	0	1	1	0	0	28	2
0	23	1	1	0	1	1	1	0	1	0	23	1
0	85	1	1	0	1	1	1	0	1	0	85	2
0	83	1	2	1	1	1	1	1	1	0	83	2
0	83	1	1	1	1	0	1	0	0	0	83	1
0	82	1	1	1	1	1	1	1	0	0	82	2
0	84	1	1	0	0	0	0	0	1	0	84	1
0	83	1	2	1	1	1	1	1	1	0	83	2
0	84	1	1	0	1	1	0	0	0	0	84	2
0	44	1	1	1	1	1	1	1	1	0	44	1
0	59	1	1	1	1	1	1	1	1	0	59	1
0	80	1	2	0	1	1	1	1	0	0	80	2
0	79	1	1	0	1	1	1	0	1	0	79	1
0	72	1	1		1	1	1	0	0	0	72	2
0	72	1	1	0	1	1	1	0	1	0	72	2
0	72	1	1	0	1	1	1	0	1	0	72	1
0	72	1	2	1	1	1	1	1	1	0	72	1
0	79	1	3	1	1	1	1	1	1	0	79	3
0	77	1	2	0	1	1	1	0	1	0	77	3
0	79	1	2	0	1	1	1	0	0	0	79	2
0	73	1	1	1	1	1	1	0	0	0	73	2
0	77	1	1	1	1	1	1	1	1	0	77	2
0	74	1	1	0	0	0	1	0	0	0	74	2
0	77	1	1	0	0	0	1	1	0	0	77	2
0	77	1	1	1	1	1	1	0	1	0	77	2
0	77	1	1	1	1	1	1	1	1	0	77	2
0	42	1	1	0	1	1	1	0	0	0	42	1
0	73	1	2	1	0	0	1	1	0	0	73	2
0	72	1	1	0	1	1	1	0	1	0	72	2
0	71	1	2	0	1	0	1	1	1	0	71	2
0	75	1	2	1	0	0	1	1	0	0	75	1
0	71	1	2	0	1	1	1	0	0	0	71	1
0	71	1	1		0	0	1	0	1	0	71	2
0	4	1	2		1	1	1	0		0	4	2
0	77	1	3	1	0	0	1	1	1	0	77	2
0	68	1	2	0	1	1	0	1	1	0	68	3
0	75	1	2	1	0	0	1	1	1	0	75	2
0	75	1	1	1	0	0	1	1	1	0	75	2
0	58	1	1	0	1	1	1	0	0	0	58	2
0	64	1	1	0	1	1	1	0	0	0	64	1
0	79	1	1	0	1	1	1	0	1	0	79	2
0	77	1	2	1	1	1	1	1	0	0	77	2
0	73	1	1	0	0	0	1	1	1	0	73	3
0	72	1	1	1	0	0	1	0	0	0	72	1
0	72	1	1	0	1	1	1	0	0	0	72	2
0	74	1	1	0	0	1	1	1	0	0	74	3
0	71	1	2	0	1	0	1	1	0	0	71	1
0	75	1	1	1	1	1	1	0	0	0	75	2
0	77	1	1		0	0	1	1	0	0	77	1
0	73	1	2	0	0	0	1	1	0	0	73	2
0	71	1	1	0	0	0	1	0	1	0	71	2
0	72	1	1	0	1	0	1	0	0	0	72	2
1	12	1	2	1	0	0	1	1	1	1	22	2
0	71	1	1	0	1	1	1	0	1	0	71	1
1	71	1	2	1	0	0	1	1	1	0	78	1
0	20	1	1	0	0	0	1	0	0	0	20	2
0	78	1	1	0	1	1	1	0	0	0	78	2
0	73	1	2	1	1	0	1	1	0	0	73	1
0	77	1	1	0	1	1	1	0	1	0	77	1
0	72	1	1		0	0	1	0	1	0	72	1
0	72	1	1	1	0	0	1	0	0	0	72	2
0	75	1	1	0	0	0	1	0	1	0	75	1
0	72	1	1		0	0	1	1	1	0	72	2
0	73	1	1	0	1	0	1	1	1	0	73	2
0	72	1	1	0	1	1	1	0	1	0	72	2
1	42	1	1	1	1	1	1	0	0	1	47	1
0	48	1	1	0	1	1	0	0	0	0	48	1
0	74	1	1	0	0	0	0	0	1	0	74	1
0	72	1	2		1	1	1	1	1	0	72	2
1	56	1	1	1	1	1	1	1	1	0	77	1
0	36	1	1	0	1	1	1	0	1	0	36	2
0	69	1	1	0	0	0	1	0	0	0	69	1
0	74	1	2	0	1	0	1	1	1	0	74	2
0	76	1	2	0	0	0	1	1	0	0	76	3
0	74	1	1		0	0	1	0	1	0	74	2
0	70	1	2	0	0	0	1	0	0	0	70	1
0	70	1	1	0	0	0	1	1	1	0	70	2
0	72	1	1	1	1	1	1	0	0	0	72	2
0	73	1	1	1	1	1	1	1	1	0	73	2
0	74	1	1	0	1		1	0	1	0	74	1
0	72	1	1	0	0	0	1	0	1	0	72	2
0	0	1	1	0	0	0	0	0	0	0	0	1
0	71	1	1	0	1	1	1	0	0	0	71	2
0	50	1	2	1	1	1	1	0	1	0	50	2
0	72	1	3	1	0	0	1	1	1	0	72	1
0	71	1	1	0	0	0	1	0	1	0	71	1
0	75	1	2	1	1	0	1	1	0	0	75	3
1	74	1	2	0	1	1	1	0	0	0	77	2
0	73	1	1	1	0	0	1	1	1	0	73	2
0	74	1	1	1	1	0	1	0	0	0	74	1
0	73	1	2	1	1	1	1	1	0	0	73	3
1	30	1	1		0	0	1	1	0	0	57	3
0	71	1	2		0	0	1	1	1	0	71	3
0	75	1	1		1	1	1	0	0	0	75	1
0	71	1	1	0	0	0	1	0	1	0	71	1
0	75	1	2	1	0	1	1	1	0	0	75	3
0	74	1	2	1	0	0	1	1	1	0	74	1
0	61	1	1	0	0	0	1	1	1	0	61	3
1	28	1	2	0	1	1	1	0	0	1	47	3
0	72	2	2	1	1	1	1	1	0	0	72	1
0	35	1	1	0	1	1	1	0	1	0	35	2
0	70	1	2	1	0	0	1	1	1	0	70	2
0	72	1	1	0	0	0	1	0	0	0	72	1
1	1	1	2		1	1	1	1	0	0	75	2
0	72	1	2		1	1	1	0	0	0	72	2
0	70	1	1		1	1	1	1	1	0	70	2
0	73	1	1	1	1	1	1	0	1	0	73	2
0	69	2	1		1	1	1	0	1	0	69	1
1	12	1	2	0	0	0	0	0	0	0	74	1
1	22	1	1	1	1	0	1	1	0	0	74	3
0	72	1	1	1	1	1	1	1	0	0	72	2
0	72	1	2	0	0	0	1	0	0	0	72	1
0	72	1	2		0	0	1	1	0	0	72	3
0	72	1	2		0	0	1	1	1	0	72	1
1	15	1	2		0	0	0	1	0	1	44	3
0	71	1	1	0	1	1	1	0	1	0	71	1
0	71	1	2	0	0	0	1	1	1	0	71	2
0	6	1	1		1	1	1	0	0	0	6	1
0	73	1	2	0	1	0	1	1	0	0	73	2
0	72	1	1	1	0	0	1	1	1	0	72	1
0	73	1	1	0	0	0	1	0	0	0	73	2
0	74	1	1	1	0	0	1	1	0	0	74	2
0	71	1	2	1	0	0	1	1	0	0	71	2
0	72	1	2	1	1	0	1	1	1	0	72	1
0	60	1	1	0	1	1	1	0	0	0	60	2
0	66	1	1	0	1	1	1	0	0	0	66	1
0	73	1	1	0	1	1	0	0	0	0	73	1
0	71	1	2	0	0	0	1	1	0	0	71	2
0	72	1	1	0	1	1	1	0	1	0	72	2
1	23	1	2		0	0	1	1	1	0	73	2
0	68	1	2		1	1	1	1	1	0	68	1
0	5	1	1	0	1	1	0	0	0	0	5	2
0	73	2	2	1	0	0	1	1	0	0	73	1
0	68	1	1	0	0	0	1	0	0	0	68	1
0	61	1	1	0	0	0	1	0	1	0	61	2
0	71	1	3	1	1	1	1	1	1	0	71	3
0	67	1	1	0	1	1	1	0	0	0	67	2
0	71	1	2	0	1	1	1	1	0	0	71	2
0	69	1	2	1	1	1	1	1	1	0	69	2
0	71	1	1	1	0	0	1	1	1	0	71	3
0	69	1	1	0	0	0	1	0	0	0	69	2
0	71	1	2	0	1	1	1	0	1	0	71	1
0	72	1	3	1	1	1	1	1	1	0	72	2
0	69	1	1	1	0	0	1	1	1	0	69	1
0	60	1	1	0	1	0	1	0	1	0	60	2
0	67	1	2	0	1	1	1	0	0	0	67	2
0	67	1	1	0	0	0	1	0	0	0	67	1
0	67	1	2	1	1	1	1	1	0	0	67	2
0	60	1	1	0	1	1	1	0	0	0	60	2
0	66	1	1	1	0	0	1	1	0	0	66	3
0	71	1	1	0	1	1	1	0	1	0	71	2
0	68	2	3	1	0	0	1	1	0	0	68	2
0	71	1	2	1	1	0	1	1	1	0	71	1
0	31	1	1	0	0	0	1	0	0	0	31	2
0	6	1	1		1	1	0	0	0	0	6	2
0	71	1	1	0	1	0	1	0	0	0	71	2
0	64	1	1	0	0	0	1	0	1	0	64	2
0	59	1	1		0	0	0	0	0	0	59	1
1	20	1	2		0	0	1	1	1	1	26	3
0	16	1	3	1	1	1	1	0	0	0	16	2
0	70	1	2		1	1	1	1	0	0	70	2
0	66	1	3		1	1	1	1	0	0	66	1
0	60	1	1	0	0	0	0	0	1	0	60	1
0	69	1	2	1	1	0	0	1	0	0	69	1
0	61	1	1	0	0	0	1	0	0	0	61	1
0	65	1	1	0	1	1	0	0	1	0	65	1
0	71	2	2	1	0	0	1	1	1	0	71	1
0	62	2	1	0	0	0	1	0	1	0	62	1
0	64	1	2		0	0	1	1	0	0	64	1
0	17	1	1	0	1	1	0	0	0	0	17	1
0	59	1	1	1	0	0	1	1	1	0	59	1
0	66	2	1	0	1	1	1	1	0	0	66	1
0	26	1	1	1	0	0	1	0	0	0	26	2
0	60	1	1	0	1	1	1	0	0	0	60	1
0	60	1	1	0	1	1	1	0	0	0	60	1
0	58	2	1	0	1	1	1	0	0	0	58	1
0	27	1	1	0	1	1	1	0	0	0	27	1
0	70	1	1	0	0	0	1	1	0	0	70	2
0	59	1	2	1	0	0	1	1	0	0	59	2
0	64	1	1	0	0	1	1	0	1	0	64	2
0	62	1	1		1	1	1	0	1	0	62	2
0	67	1	1	0	1	1	1	1	1	0	67	2
0	24	1	2	1	1	1	1	1	0	0	24	2
0	59	1	1	0	1	1	1	0	1	0	59	2
0	30	1	1	0	1	1	1	1	1	0	30	2
0	59	1	2	1	1	1	1	1	0	0	59	2
1	16	1	3	1	0	0	1	1	0	1	30	1
1	49	2	1	0	1	0	1	0	0	0	57	1
0	75	1	2	0	1	1	0	1	0	0	75	3
0	70	1	1	0	0	0	1	0	1	0	70	1
0	76	1	2	1	1	1	1	1	1	0	76	3
0	72	1	1	0	1	1	1	1	1	0	72	2
0	73	1	2	0	0	0	1	1	0	0	73	2
0	36	1	1	0	1	0	1	0	1	0	36	2
0	60	1	1	0	1	0	0	0	1	0	60	1
0	75	1	1	0	1	1	1	0	1	0	75	1
0	59	1	1	0	0	0	1	1	0	0	59	3
0	74	1	2	0	0	0	1	1	0	0	74	2
0	72	1	1	0	1	1	1	0	1	0	72	1
0	71	2	1	0	0	0	1	0	1	0	71	1
0	73	1	1	0	0	0	1	0	1	0	73	2
0	73	1	2	0	1	1	1	1	1	0	73	1
0	72	1	1	0	0	0	1	1	1	0	72	2
0	71	1	2	0	1	1	1	1	0	0	71	3
0	72	1	1	0	1	1	1	0	1	0	72	3
0	60	1	1	0	1	1	0	0	0	0	60	1
0	33	2	1	0	0	1	1	0	1	0	33	1
0	0	1	1	0	0	0	1	0	1	0	0	1
0	69	1	1	0	1	1	1	0	0	0	69	1
0	72	1	1	1	1	1	1	1	1	0	72	1
1	27	1	2	1	1	1	1	1	1	0	75	3
0	73	1	2	0	1	1	1	0	1	0	73	2
0	34	1	1	1	0	0	1	1	0	0	34	2
0	73	1	1	0	0	0	0	0	1	0	73	2
0	72	1	2		0	0	1	1	1	0	72	2
0	30	1	1		0	1	1	0	0	0	30	3
0	68	1	3		0	0	1	1	1	0	68	2
0	68	1	1	1	1	1	1	1	1	0	68	1
0	60	1	1	0	0	0	1	0	1	0	60	1
0	63	1	1	0	0	0	1	0	0	0	63	1
1	29	1	1	1	1	0	1	1	1	0	50	2
0	28	1	2	1	1	1	1	1	0	0	28	3
0	30	1	1	0	1	1	1	0	1	0	30	2
0	69	1	1	0	0	0	1	1	1	0	69	2
0	60	2	1	0	0	0	1	0	0	0	60	1
0	66	1	1	0	1	1	1	0	0	0	66	2
0	40	1	1	0	1	1	1	0	0	0	40	1
0	60	1	1	0	1	1	1	0	0	0	60	2
0	62	1	2	1	0	0	0	1	1	0	62	2
0	60	1	1	0	0	0	1	0	1	0	60	1
0	64	1	1	0	1	1	1	1	1	0	64	2
0	60	1	2	0	0	0	1	1	1	0	60	2
0	63	1	1	0	0	1	1	0	1	0	63	2
0	66	1	1	1	1	1	1	1	1	0	66	3
0	60	1	1	1	1	1	1	1	1	0	60	2
0	65	1	1	0	0	0	1	0	1	0	65	1
0	67	1	1	1	1	1	1	1	0	0	67	1
0	65	1	1	0	0	0	1	0	1	0	65	3
0	66	1	1	0	1	1	1	0	0	0	66	2
0	65	1	1	1	0	0	1	1	1	0	65	1
0	65	1	2	1	1	1	1	0	0	0	65	2
0	63	1	2	0	1	1	1	0	0	0	63	2
0	66	1	1	1	0	0	1	1	0	0	66	2
1	44	1	1	0	1	1	1	0	0	0	66	2
0	65	1	1	0	1	1	1	0	1	0	65	2
0	64	1	1		1	1	1	1	0	0	64	2
0	67	1	2	1	1	1	1	1	0	0	67	3
0	60	1	1	0	0	0	0	0	1	0	60	1
0	60	1	1	0	0	0	1	0	0	0	60	2
0	60	1	1	0	1	1	0	0	0	0	60	1
0	59	1	1	0	0		1	0	0	0	59	2
0	67	1	1	1	0	0	1	1	0	0	67	1
0	67	1	2	1	1	1	1	1	1	0	67	1
0	27	1	2	1	0	0	1	1	1	0	27	1
0	62	1	1		0	0	1	0	1	0	62	1
1	23	1	2	1	1	1	1	1	1	0	67	3
0	60	2	2		1	1	1	1	0	0	60	2
0	65	1	1		1	1	1	0	0	0	65	2
0	64	1	1	0	1	1	1	1	0	0	64	2
0	62	1	1		1	1	1	0	0	0	62	2
0	66	1	1		1		1	1	1	0	66	2
0	29	1	1	0	0	0	1	1	1	0	29	2
0	63	1	1	1	1	1	1	1	1	0	63	2
0	4	1	1	1	1	0	1	1	0	0	4	2
0	61	1	2	1	1	1	1	1	1	0	61	2
0	24	1	1	0	0	0	0	0	1	0	24	1
0	58	1	2	1	0	0	1	1	0	0	58	2
0	66	1	1	0	0	1	1	0	0	0	66	2
0	66	1	2	1	0	0	1	1	1	0	66	3
0	62	1	1	0	1	1	0	0	1	0	62	1
0	64	1	2	1	0	0	1	1	1	0	64	2
0	59	1	1	1	0	0	1	1	1	0	59	2
0	54	1	2	1	1	1	0	0	1	0	54	3
0	63	1	3	0	0	0				0	63	2
0	59	1	1	0	1	1	1	0	1	0	59	2
0	59	1	3	1	1	1	0	1	0	0	59	3
0	60	1	1	0	0	0	1	1	0	0	60	2
0	64	1	2	1	1	1	1	1	0	0	64	2
0	60	1	1	0	0	0	1	0	1	0	60	2
0	66	1	1	0	1	1	1	0	1	0	66	2
0	61	1	1	0	1	1	1	0	1	0	61	1
0	65	1	1	0	1	1	0	0	0	0	65	1
0	63	1	2	0	0	0	1	0	1	0	63	2
0	60	1	3	0	0	0	1	1	1	0	60	3
0	63	2	2		0	0	1	1	0	0	63	1
0	60	1	1		1	1	1	0	0	0	60	2
0	64	1	3		0	0	1	1	0	0	64	2
0	60	1	2	0	1	1	1	1	1	0	60	2
0	60	1	1	0	1	0	1	0	0	0	60	2
0	39	1	2	0	0	0	1	1	0	0	39	1
0	64	1	1	0	0	0	1	1	1	0	64	2
0	62	1	1	0	1	1	1	0	1	0	62	2
0	64	1	2	1	0	0	1	1	1	0	64	3
0	62	1	1	0	1	1	0	0	0	0	62	1
0	62	1	2	0	1	1	1	1	1	0	62	3
0	63	1	1	0	1	0	1	1	1	0	63	2
0	63	1	1	0	1	1	1	1	0	0	63	2
0	25	1	1	0	0	0	1	0	1	0	25	2
0	46	1	1	0	1	1	1	0	1	0	46	2
0	60	2	2	0	0	0	1	1	0	0	60	1
0	63	1	1	1	1	0	1	1	1	0	63	1
1	47	2	3	1	0	0	1	1	1	0	64	2
0	63	1	2	1	0	0	1	1	1	0	63	2
0	62	1	1	0	1	1	1	1	1	0	62	2
1	29	2	2	1	1	1	1	1	1	1	46	1
0	59	1	2	0	0	0	1	1	1	0	59	1
0	61	1	1	0	1	1	1	0	1	0	61	1
0	60	1	1	0	1	1	1	0	0	0	60	1
0	60	1	1	1	1	1	1	1	0	0	60	3
0	61	1	1	0	1	1	1	0	0	0	61	2
0	62	1	1	0	1	0	1	1	0	0	62	1
0	57	1	1	0	0	0	0	1	1	0	57	3
0	61	1	2	1	1	0	1	1	1	0	61	3
0	61	1	1	0	1	1	1	1	0	0	61	1
0	61	1	2	1	0	0	0	1	0	0	61	3
0	23	1	3	1	0	0	1	1	1	0	23	3
0	60	1	1	0	1	1	1	0	1	0	60	2
0	0	1	1	1	0	0	1	0	1	0	0	1
0	61	1	1	1	1	1	1	1	0	0	61	1
0	62	1	1	0	1	0	1	1	1	0	62	1
0	62	1	1		1	1	1	1	1	0	62	2
0	24	1	2		1	1	1	0	0	0	24	1
0	60	1	1		1	1	1	0	1	0	60	2
0	60	1	1		1	1	1	0	0	0	60	2
0	12	1	1	0	1	1	1	0	1	0	12	1
0	59	1	3	1	0	0	1	1	1	0	59	3
0	60	1	2	0	1	1	0	1	0	0	60	3
0	29	1	1	0	0	0	1	0	0	0	29	2
0	17	1	1	0	1	1	1	0	0	0	17	2
0	60	1	2	0	0	0	1	1	1	0	60	2
0	59	1	1	0	0	0	1	0	0	0	59	1
0	61	1	2	0	1	0	1	1	0	0	61	2
0	62	1	1	0	0	0	1	0	1	0	62	1
0	60	1	1	0	1	1	1	0	0	0	60	1
0	59	1	1	0	0	0	1	0	0	0	59	1
0	60	1	1	0	1	1	1	0	1	0	60	1
0	58	1	1	0	0	0	1	0	1	0	58	1
0	60	1	1	1	1	1	1	0	1	0	60	1
0	59	2	1	0	0	0	1	0	1	0	59	2
0	60	1	2	1	0	0	1	1	0	0	60	1
0	60	1	1	0	0	0	1	0	1	0	60	1
0	61	1	1	1	0	0	1	1	0	0	61	2
0	59	1	1	0	1	1	1	0	0	0	59	2
0	60	1	2	0	1	1	1	0	0	0	60	1
0	59	1	1	0	1	0	1	0	0	0	59	1
0	60	1	1	1	1	1	1	1	0	0	60	1
0	32	1	1	0	0	0	1	1	0	0	32	2
0	61	2	1	0	0	0	1	0	0	0	61	1
0	59	1	1		1	1	1	0	1	0	59	2
0	60	2	2	1	1	0	1	1	0	0	60	1
0	59	1	1	0	1	0	1	0	0	0	59	1
0	59	1	1	1	0	0	1	1	1	0	59	2
0	60	1	2	0	1	1	0	0	0	0	60	1
0	19	1	1	0	1	1	1	0	1	0	19	2
0	59	1	1	1	1	1	1	1	1	0	59	1
0	59	1	1	0	1	1	1	0	1	0	59	2
0	59	1	2	1	0	0	1	1	0	0	59	3
0	58	1	2	0	1	1	1	0	0	0	58	2
0	57	1	1	1	1	1	1	1	1	0	57	3
0	19	1	1	0	1	1	0	0	0	0	19	1
0	59	1	1	1	1	1	1	1	1	0	59	2
0	59	1	1	0	1	1	1	0	1	0	59	2
0	39	1	1	1	1	0	1	1	0	0	39	2
0	60	1	2	1	1	1	1	1	0	0	60	2
0	59	1	3	1	0	0	1	1	1	0	59	3
0	57	1	1	0	1	1	1	0	0	0	57	2
0	56	1	2	1	1	1	1	1	1	0	56	2
0	54	2	1	0	0	0	1	0	0	0	54	1
0	47	1	1	1	1	1	1	0	0	0	47	3
0	24	1	2		0	0	1	1	1	0	24	2
0	56	1	1	1	0	0		1	1	0	56	2
0	57	2	1		1	1	1	0	1	0	57	1
0	55	1	2	0	0	0	1	1	1	0	55	2
0	57	1	1	0	1	1	1	0	0	0	57	1
0	57	1	1	0	1	1	1	0	1	0	57	1
0	61	1	1	0	0	0	1	0	0	0	61	1
0	53	1	2	0	1	1	1	1	0	0	53	3
0	64	1	1	1	1	1	1	0	0	0	64	2
0	56	1	1	0	1	1	1	0	0	0	56	1
0	56	1	1	0	1	1	1	0	0	0	56	1
0	54	1	1	0	1	1	1	0	1	0	54	2
0	57	1	1	0	1	1	0	0	0	0	57	1
0	18	2	1	0	0	0	1	0	0	0	18	1
0	58	1	1	1	0	0	1	1	0	0	58	2
0	54	1	2	1	1	0	0	1	1	0	54	3
1	51	1	2	1	0	0	1	1	0	0	57	2
0	58	1	1	1	0	0	1	1	1	0	58	2
0	49	1	1	0	1	1	1	1	1	0	49	1
0	58	1	1	0	1	1	1	0	1	0	58	2
0	24	1	2	0	0	0	1	1	1	0	24	1
0	57	2	1	1	0	0	1	1	0	0	57	1
0	58	1	2	0	0	0	1	0	0	0	58	1
0	13	1	2	0	0	0	1	1	1	0	13	2
0	49	1	1	1	0	0	1	0	1	0	49	1
0	28	2	1	0	1	1	1	0	0	0	28	1
0	56	1	1	1	1	0	1	1	1	0	56	3
0	51	1	2	0	1	1	1	0	1	0	51	2
0	54	1	2	1	1	1	1	1	1	0	54	2
0	48	1	1	0	1	0	0	0	1	0	48	1
0	47	1	1	1	1	1	1	1	1	0	47	1
0	55	1	2	1	0	0	1	1	1	0	55	2
0	55	1	1	0	1	1	1	1	0	0	55	3
0	48	1	2	0	0	0	1	1	0	0	48	2
0	54	1	1	0	0	0	1	1	1	0	54	2
0	56	1	2	1	1	1	1	1	1	0	56	3
1	29	1	1	0	1	1	1	0	0	0	56	2
0	48	1	1	1	0	0	1	1	0	0	48	1
0	54	1	1	0	1	1	0	0	1	0	54	2
0	49	1	1	0	1	1	1	1	1	0	49	1
0	56	1	1	1	1	1	1	1	1	0	56	2
0	45	1	1	0	0	0	1	0	0	0	45	1
0	53	1	2	1	1	0	1	1	1	0	53	2
1	12	1			0	0	1			0	56
0	51	1	1	0	1	1	1	0	1	0	51	1
1	31	1	2		1	1	1	1	1	0	54	3
0	13	1	1		1	1	1	0	1	0	13	1
0	53	1	1	0	1	1	1	0	0	0	53	1
0	53	1	1	1	1	1	1	0	1	0	53	1
0	52	1	1	1	1	1	1	1	0	0	52	2
0	26	2	1	1	0	0	1	1	0	0	26	1
0	48	1	1		1	1	1	1	0	0	48	3
0	52	1	1		0	0	1	0	1	0	52	1
0	53	2	1		1	1	1	0	0	0	53	1
0	53	1	1	0	1	1	1	0	1	0	53	2
0	2	1	1	0	0	0	0	0	1	0	2	1
0	54	1	1	0	0	0	1	0	1	0	54	2
1	19	1	1	0	0	0	1	1	0	1	38	2
0	54	1	1	1	1	1	1	1	0	0	54	3
0	54	1	2		1	1	1	1		0	54	1
0	51	1	1		1	0	1	0	0	0	51	1
0	53	1	1	1	0	0	1	1	0	0	53	1
0	53	1	2	1	1	1	1	1	0	0	53	3
0	24	1	1	0	1	1	1	0	1	0	24	1
0	48	1	3	1	0	0	1	1	0	0	48	2
0	47	1	1	0	0	0	1	0	1	0	47	2
0	53	1	2	0	0	0	1	0	1	0	53	1
0	40	1	1	0	0	0	0	0	1	0	40	2
0	53	1	2	1	0	0	1	1	1	0	53	2
0	12	1	1	0	1	1	0	0	1	0	12	1
0	48	1	1	0	1	1	1	0	1	0	48	1
0	24	1	1	0	1	1	1	0	0	0	24	2
0	53	1	1	0	1	1	0	0	0	0	53	2
0	52	1	1	0	1	1	1	0	0	0	52	1
0	53	1	2	0	0	0	1	1	1	0	53	2
1	5	1	2	1	1	1	1	1	1	0	53	3
1	9	1	2	0	0	0	1	1	0	0	52	2
0	48	1	1	1	1	1	1	0	0	0	48	1
0	51	1	2	0	0	0	1	1	0	0	51	3
0	49	2	1	0	0	0	0	0		0	49	1
0	50	2	3	1	1	1	1	1	1	0	50	1
0	52	1	1	1	1	1	1	1	1	0	52	1
0	52	1	1	1	1	1	1	1	0	0	52	2
0	12	1	1	0	1	1	1	0	0	0	12	2
0	52	1	1	0	0	0	1	0	1	0	52	1
0	53	1	2	1	0	0	1	1	1	0	53	3
0	49	1	1	1	1	1	1	0	1	0	49	2
0	47	1	1	0	1	1	1	0	1	0	47	1
0	51	1	1	0	0	0	1	0		0	51	2
0	50	1	1	0	0	0	1	0	1	0	50	2
0	49	1	2	1	1	1	1	1	1	0	49	2
0	49	1	2	1	0	0	1	1	1	0	49	2
0	50	1	1	0	0	0	1	0	0	0	50	2
0	48	1	2	1	1	1	1	1		0	48	2
0	51	1	2	0	1	1	1	0	0	0	51	2
0	47	1	1	0	0	0	1	1	1	0	47	1
0	49	2	2	0	1	1	1	0	1	0	49	2
0	51	2	1	1	1	1	1	1	0	0	51	1
0	49	1	1	0	1	1	1	0	1	0	49	2
0	47	1	2	0	1	1	0	0	1	0	47	2
0	51	1	1	1	1	1	1	0	0	0	51	2
1	48	1	2	0	1	1	1	1	0	0	50	2
0	50	1	1	1	1	0	1	1	1	0	50	1
0	51	1	2	0	0	0	0	1	0	0	51	3
1	2	1	3		1	1	1	1	0	0	52	3
0	47	1	1		0	0	1	0	0	0	47	1
0	49	1	1		1	1	1	0	0	0	49	2
0	0	1	1		1	1	1	1	1	0	0	3
1	39	1	1	1	1	1	1	1	0	0	51	3
0	49	1	1	0	1	1	1	1	1	0	49	1
0	50	1	2	0	1	1	1	0	1	0	50	1
0	52	1	1	0	1	1	1	0	0	0	52	2
0	48	1	1	0	0	0	1	0	1	0	48	1
1	47	1	2	0	1	1	1	0	1	0	50	2
0	49	1	1	0	1	0	0	0	0	0	49	1
0	51	1	2	1	0	0	1	1	1	0	51	2
0	51	1	1	0	1	0	1	0		0	51	2
0	50	1	1		0	0	1	0	1	0	50	2
0	50	1	1	0	0	0	1	0	0	0	50	1
0	48	1	1	0	0	0	1	0	0	0	48	1
0	49	1	3	1	1	1	1	1	0	0	49	2
0	51	1	1	1	1	1	1	1	1	0	51	2
0	12	1	1	0	1	1	1	0	0	0	12	2
0	49	1	1	0	1	0	1	1	1	0	49	2
0	22	1	2	0	0	0	1	1	1	0	22	3
0	47	1	2	1	0	0	1	1	1	0	47	2
1	7	2	3	1	1	1	1	1	1	1	42	2
0	43	1	2	1	1	1	1	0	0	0	43	2
0	10	1	1	0	0	0	1	0	0	0	10	1
0	50	1	3	0	1	1	1	0	0	0	50	2
0	49	1	3	1	0	0	1	1		0	49	3
0	47	1	2	1	0	0	1	1	0	0	47	2
0	50	1	1	1	1	1	1	1		0	50	2
0	48	1	2	0	0	0	1	0	1	0	48	2
0	50	1	1	1	1	1	1	1	1	0	50	1
0	51	1	1	0	1	1	1	0	1	0	51	2
0	48	1	2	1	0	0	1	1	1	0	48	2
0	50	1	2	1	1	1	1	1	0	0	50	3
0	48	1	2	0	1	1	1	0	0	0	48	2
0	47	1	1	0	1	1	1	0	1	0	47	2
0	47	1	1	0	1	1	0	0	0	0	47	1
0	47	1	1		0	0	1	1	1	0	47	1
0	9	1	1	0	1	1	1	0	0	0	9	2
1	2	1	3	1	1	1	1	1	0	1	50	1
0	48	2	2		0	0	1	1		0	48	1
0	45	1	1	0	0	0	1	0	0	0	45	2
0	45	1	3		0	0	1	1	1	0	45	3
0	48	1	2	0	0	0	1	0	0	0	48	2
0	49	1	1	0	1	1	1	0	1	0	49	1
0	49	1	1		0	0	1	0		0	49	1
0	6	2	1	0	0	0	0	0	1	0	6	1
0	49	1	1	0	0	0	1	0	0	0	49	2
0	49	1	1	0	1	1	1	1	1	0	49	1
1	17	1	2	1	0	0	0	0	0	0	49	2
0	49	1	1	0	1	1	1	0	0	0	49	2
0	48	1	2	0	1	1	1	1	0	0	48	2
0	49	1	1	0	1	1	1	0	0	0	49	2
0	43	1	1	0	1	1	0	0	0	0	43	1
0	48	1	1	0	1	1	1	0	0	0	48	3
0	10	1	1	0	0	0	1	0	1	0	10	2
0	46	1	1	0	0	0	1	1	0	0	46	2
0	49	1	2	0	1	1	1	0	0	0	49	2
0	46	1	1	0	0	1	1	1	1	0	46	2
0	49	1	2	1	0	0	1	1	0	0	49	2
0	1	1	2	1	0	0	1	1	0	0	1	2
0	47	1	1	0	1	1	1	0	1	0	47	2
0	42	1	1	0	0	0	1	0	1	0	42	1
0	47	1	2	0	1	1	1	0	0	0	47	2
0	43	1	1	1	0	0	1	1	1	0	43	2
1	36	1	2	0	1	1	0	0	0	0	47	2
0	46	2	1	0	1	1	1	0	0	0	46	1
0	46	1	2	0	1	1	1	0	0	0	46	1
0	47	1	1	0	1	0	0	0	1	0	47	1
0	48	1	1	0	0	0	1	0	1	0	48	1
0	12	1	2	0	0	0	1	1	1	0	12	2
0	44	1	1	0	0	0	1	0	1	0	44	1
0	45	1	1	0	1	1	1	0	1	0	45	3
0	47	1	2	0	1	1	1	0	0	0	47	2
0	46	1	3	1	1	1	1	1	1	0	46	2
0	45	1	1	0	1	1	1	0	0	0	45	2
0	47	1	1	0	1	1	1	0	1	0	47	1
0	47	1	1	0	1	1	0	0	0	0	47	1
0	36	1	1	0	0	0	0	0	0	0	36	1
0	47	1	1	0	1	1	1	0	1	0	47	2
0	36	1	1	0	0	0	0	0	0	0	36	2
0	46	1	1	1	1	0	1	1	1	0	46	2
0	17	1	1	0	1	0	1	1	1	0	17	2
0	33	1	2	1	0	0	1	1	1	0	33	2
0	46	1	1	1	0	0	1	1		0	46	2
0	45	1	1	0	1	1	1	0	1	0	45	2
0	7	1	1	0	0	0	0	0	0	0	7	1
0	48	1	1	0	1	1	0	0	1	0	48	2
0	43	1	2	1	1	1	1	1	1	0	43	2
0	35	1	1	0	1	1	1	0	1	0	35	2
0	46	1	2	0	1	1	1	1	1	0	46	2
0	45	1	1	0	0	0	0	0	0	0	45	3
0	48	1	1	0	1	1	0	0	1	0	48	2
0	45	1	3	1	1	1	1	1	1	0	45	2
0	6	1	1	0	1	1	1	0	1	0	6	2
0	44	1	1	0	1	1	1	0	0	0	44	2
0	46	2	2	0	1	1	1	0	0	0	46	2
0	45	1	1	0	0	0	1	0	1	0	45	2
0	29	1	1	1	1	1	0	0	0	0	29	2
0	45	1	1	1	0	0	1	1	1	0	45	1
0	36	1	1	0	1	1	1	0	1	0	36	3
0	46	1	1	0	0	0	1	0	1	0	46	1
0	45	1	1	0	0	1	1	0	0	0	45	2
0	45	1	1	0	0	0	1	0	1	0	45	1
0	47	1	2	1	1	1	1	1	1	0	47	2
0	47	1	1	0	1	0	0	0	1	0	47	2
0	44	1	1	0	1	1	0	1	1	0	44	3
0	6	1	1	0	0	0	1	0	1	0	6	2
0	46	1	1	0	1	1	1	0	1	0	46	1
0	46	2	1	1	1	1	1	1	0	0	46	1
1	17	1	2	0	1	1	1	1	0	0	22	3
0	29	1	1	1	0	0	1	1	1	0	29	2
0	44	1	1	0	0	0	1	1	1	0	44	3
0	45	1	1	1	1	1	1	1	1	0	45	2
0	35	1	1	0	0	0	1	0	1	0	35	2
0	43	1	1	0	1	1	1	0	1	0	43	1
0	21	1	1		0	0	1	1	1	0	21	2
0	45	1	1		0	0				0	45	3
0	47	1	2		1	0	1	1	0	0	47	3
0	53	1	1	0	0	0	1	0	0	0	53	1
0	46	1	1	0	0	0	1	0	0	0	46	1
0	54	1	1	0	1	0	1	0	1	0	54	1
0	53	1	1	0	1	1	1	1	0	0	53	2
0	53	1	1	0	0	0	1	0	0	0	53	1
0	45	1	2	0	1	1	1	0	1	0	45	1
0	38	1	1	0	1	1	0	0	0	0	38	1
0	4	1	1	0	0	0	1	0	0	0	4	2
0	46	1	1	1	1	1	1	1	1	0	46	3
0	43	1	2	0	1	0	1	1	1	0	43	1
0	42	1	1	0	1	1	0	0	0	0	42	2
0	44	1	1	1	0	0	1	1	1	0	44	2
0	44	2	2	0	1	1	1	0	0	0	44	2
0	36	1	1	0	0	0	1	0	0	0	36	2
0	4	1	1	0	0	0	1	1	0	0	4	3
0	42	1	2	0	1	1	1	1	1	0	42	3
0	41	2	2	0	1	1	1	1	0	0	41	1
0	44	1	1	0	0	0	0	0	1	0	44	1
0	43	1	2	0	1	1	1	0	0	0	43	2
0	41	1	1	0	1	0	1	0	0	0	41	1
0	42	1	1	0	1	1	1	0	1	0	42	2
0	36	1	1	0	1	1	1	0	1	0	36	2
0	45	1	1	0	1	1	1	0	1	0	45	2
0	43	1	2	0	0	0	1	1	1	0	43	2
0	42	1	2	0	1	1	0	0	0	0	42	3
0	40	1	1	0	0	0	1	0	0	0	40	2
0	43	1	2	0	0	0	1	1	0	0	43	3
0	40	1	1	0	0	0	1	0	1	0	40	2
0	41	2	1	0	0	0	1	0	1	0	41	2
0	42	1	1	0	1	1	1	0	1	0	42	1
0	38	1	1		0	0	0	0	1	0	38	1
0	17	1	1		0	0				0	17	2
0	43	1	2	0	1	1	1	1	1	0	43	3
0	1	1	1	0	0	0	1	1	1	0	1	3
0	40	1	1	0	0	0	1	0	0	0	40	1
0	42	1	1	0	1	1	1	0	0	0	42	1
0	41	1	1	0	0	1	1	1	0	0	41	2
0	41	1	2	0	1	1	1	0	0	0	41	2
0	39	1	2	1	0	0	1	0	0	0	39	2
0	41	1	3	1	0	0	1	1	1	0	41	2
0	38	2	1	0	1	1	1	0	1	0	38	1
0	40	1	1	1	1	1	1	0	1	0	40	2
0	38	1	1	0	0	0	0	0	0	0	38	2
0	36	1	1	0	0	0	1	0	1	0	36	1
0	42	1	2	1	1	1	1	1	1	0	42	2
0	40	1	1	0	0	0	1	0	1	0	40	1
0	40	1	2		1	1	1	0	0	0	40	2
0	1	1	1		0	0	1	1	0	0	1	1
0	36	1	1		0	0	1	1	0	0	36	2
0	41	1	1		1	1	0	0	0	0	41	2
0	40	1	2		1	1	1	1		0	40	3
0	28	2	1		0	0	1	0	1	0	28	1
0	41	1	1	0	0	0	1	0	1	0	41	2
0	39	1	2	0	1	0	1	1	1	0	39	2
0	41	2	2	0	0		1	0	0	0	41	1
0	41	1	1	0	1	1	0	0	0	0	41	1
0	42	2	1		1	1	1	0	1	0	42	1
0	39	1	2	0	1	1	1	0	0	0	39	2
0	39	1	2	0	0	0	1	1	0	0	39	2
0	12	1	2	1	0	0	1	0	0	0	12	2
0	40	1	2	1	1	0	1	1	1	0	40	3
0	36	2	2	1	1	1	1	1	1	0	36	2
0	39	1	2		1	1	1	0		0	39	2
0	1	2	1	0	1	1	0	0	0	0	1	1
0	36	1	1	0	0	0	1	0	1	0	36	2
0	39	1	1	0	0	0	0	0	1	0	39	2
0	40	1	3	0	1	1	1	1	0	0	40	2
0	36	1	1	0	1	1	0	0	0	0	36	1
0	35	1	1	0	0	0	1	0	0	0	35	2
0	38	1	3	1	1	1	1	1	1	0	38	2
0	36	1	1	1	0	0	1	0	1	0	36	2
0	38	1	1	0	0	0	1	0	0	0	38	2
0	38	1	1		1	1	1	0	1	0	38	2
0	38	1	2	0	1	1	1	0	0	0	38	2
0	38	1	1	0	1	1	1		1	0	38	2
0	35	1	1	0	1	1	0	0	0	0	35	2
0	37	1	1	0	1	1	1	0	1	0	37	2
0	38	1	1	0	1	1	1	1	1	0	38	1
0	38	1	1	0	0	0	1	0	0	0	38	1
1	25	1	2	1	1	1	1	1	1	0	39	3
1	26	1	3	1	0	0	1	1	1	0	39	2
0	33	1	1	1	0	0	1	1	1	0	33	2
0	37	1	2	1	0	0	1	1	0	0	37
0	39	1	1	1	1	1	1	1	1	0	39	2
0	38	1	1	0	1	1	1	0	0	0	38	1
0	36	2	2	0	1	1	1	0	0	0	36	2
0	38	1	1	0	1	1	1	0	0	0	38	2
1	12	1	2	1	1	1	1	1	1	0	39	2
0	1	1	1	0	1	1	1	0	0	0	1	1
0	38	1	1	1	0	0	1	0	0	0	38	1
0	35	1	1	0	1	1	1	0	1	0	35	2
0	36	1	2	0	0	0	1	0	0	0	36	1
0	36	1	1	0	1	1	1	0	1	0	36	2
0	36	1	1		0	1	0	0	1	0	36	1
0	36	1	1	1	1	1	1	1	1	0	36	2
0	36	1	1	0	1	1	1	1	1	0	36	3
0	38	1	1	0	0	0	0	0	1	0	38	1
0	35	1	2	0	1	1	1	0	0	0	35	2
0	36	1	1	0	1	0	1	0		0	36	2
0	36	1	1	0	1	0	1	0		0	36	2
0	37	1	1	1	0	0	1	1	1	0	37	2
0	36	1	1	0	1	1	1	1	0	0	36	2
0	38	1	2	0	0	0	1	1	0	0	38	2
1	14	1	2	1	1	1	1	1	1	1	31	3
0	38	1	1	0	1	0	1	0	0	0	38	2
0	37	1	1		0	0	1	0	1	0	37	2
0	35	1	1	0	1	1	0	0	0	0	35	2
0	35	1	1		1	1	0	0	0	0	35	2
0	38	1	1	0	1	1	1	0	1	0	38	1
0	33	1	1	0	1	1	0	0	1	0	33	1
0	36	1	1	1	1	1	1	1	1	0	36	2
0	36	1	1	0	0	0	1	0	0	0	36	2
0	36	1	2	1	0	0	0	1	1	0	36	3
0	36	1	1	1	0	0	1	1	1	0	36	2
0	35	1	1	1	1	1	0	1	0	0	35	3
0	36	1	1	1	0	0	1	1	1	0	36	2
0	37	1	2	0	0	0	1	0	0	0	37	2
0	35	1	1	0	1	1	1	0	1	0	35	2
0	34	2	1		1	0	1	0	0	0	34	1
0	36	1	1	0	0	0	1	0	1	0	36	1
0	34	1	1		1	1	1	1	1	0	34	2
0	35	1	1	1	0	0	1	1	0	0	35	2
0	36	2	1	0	0	0	1	0	1	0	36	2
0	34	1	1	1	1	1	1	1	1	0	34	1
0	34	1	1		0	0	1	0	1	0	34	2
0	37	1	3		1	1	1	1	0	0	37	1
0	35	1	2		1		1	0	0	0	35	2
0	33	1	1	0	1	1	1	0	0	0	33	2
0	35	1	1		1	1	1	0	0	0	35	2
0	34	1	2		0	0	1	1	0	0	34	2
0	35	1	1	0	1	1	1	1	0	0	35	3
0	35	1	2	0	1	0	1	1	0	0	35	1
0	35	1	1		1	1	1	0		0	35	2
0	33	1	1	0	1	0	1	0	1	0	33	1
0	36	1	2		1	1	0	0	0	0	36	1
0	35	1	2		1	1	1	1	1	0	35	2
0	34	1	2		0	0	1	1	0	0	34	3
0	35	1	1		0	0	1	1	1	0	35	2
0	24	1	1	0	0	0	1	1	0	0	24	2
0	23	1	1	0	0	0	1	0	0	0	23	2
0	35	1	1	0	0	0	1	0	1	0	35	3
0	33	1	1	1	1	1	1	0	0	0	33	2
0	24	1	1	0	0	0	1	0	1	0	24	1
0	33	1	1	0	0	0	1	0	0	0	33	2
0	36	2	1	0	0	0	1	0	1	0	36	1
0	33	1	1	0	0	1	1	0	1	0	33	2
0	33	2	3	1	0	0	1	1	1	0	33	1
0	29	1	1	0	1	1	1	0	0	0	29	1
0	33	1	1	0	1	1	1	1	1	0	33	3
0	32	1	1	0	0	0	1	1	1	0	32	2
0	23	1	1		1	1	1	0	0	0	23	1
0	34	1	1		1	1	1	0	0	0	34	1
0	31	1	1	1	1	1	1	0	0	0	31	2
0	34	1	2	1	1	1	1	1	0	0	34	2
0	33	1	1	1	1	1	1	0	0	0	33	2
0	31	1	1	0	0	0	1	0	0	0	31	2
0	32	1	3	1	0	0	0	1	1	0	32	3
0	31	1	2	1	0	0	1	1	1	0	31	2
0	34	1	1	0	1	0	1	0	1	0	34	2
0	1	1	1	0	1	1	1	0	0	0	1	1
1	1	1	3	0	1	0	1	1	1	1	20	3
0	33	1	1	0	0	0	1	0	1	0	33	2
0	34	1	2	1	0	0	1	1	1	0	34	3
0	31	1	2		0	0	1	1	0	0	31	3
0	32	1	1	0	1	1	1	0	0	0	32	2
0	34	1	2	1	0	0	1	1	1	0	34	2
0	23	1	1		1	1	1	0	1	0	23	1
0	33	1	2	1	0	0	1	1	0	0	33	2
0	30	1	2	1	1	1	1	1	0	0	30	3
1	12	1	2		1	1	1	1	1	0	32	2
1	33	2	2	0	1	1	1	0	0	0	33	2
0	1	1	1	1	0	0	1	0	1	0	1	2
0	30	1	2	1	1	1	0	0	0	0	30	3
0	32	1	1	0	1	1	0	0	0	0	32	1
0	33	1	2	1	0	0	1	1	0	0	33	1
0	35	1	1	0	0	0	1	0	0	0	35	2
0	25	1	1	0	1	0	0	0		0	25	1
0	39	1	1	0	0	0	1	0	0	0	39	1
0	33	1	1	0	0	0	1	0	0	0	33	2
0	12	1	1	0	1	1	0	0	1	0	12	1
0	24	1	1		0	0	1	1	1	0	24	2
0	30	1	1	0	0	0	0	0	0	0	30	1
0	21	1	1	0	1	1	1	0	1	0	21	1
0	28	1	1	0	1	1	0	0	0	0	28	2
0	26	1	1	0	1	0	1	0	1	0	26	1
0	32	1	1	0	0	0	1	0	0	0	32	2
0	11	1	1	0	1	1	1	0	0	0	11	2
0	22	1	1	1	1	1	1	1	1	0	22	2
0	29	1	1	0	0	0	1	0	0	0	29	1
0	24	1	1	0	1	1	0	0	0	0	24	2
0	23	1	1	0	0	0	1	0	1	0	23	1
0	21	1	1	1	1	1	1	1	1	0	21	3
0	23	1	2	0	0	0	1	1	0	0	23	2
0	22	1	1		1	1	1	0	1	0	22	3
0	33	1	2	1	1	1	1	0	0	0	33	2
1	30	1	3	1	0	0	1	1	1	0	32	2
0	27	1	3	1	0	0	1	1	1	0	27	1
1	16	1	1	1	1	1	1	0	0	0	29	2
0	30	1	1	1	1	1	1	1	1	0	30	3
0	25	1	2	1	0	0	1	1	1	0	25	1
0	31	2	2	0	1	0	1	0	0	0	31	1
0	3	1	1		0	0				0	3	1
0	30	1	1	0	0	0	1	1	1	0	30	2
0	32	1	1	0	1	1	1	0	0	0	32	2
0	30	1	1		1	1	1	1	0	0	30	3
0	24	1	1	0	1	1	1	0	1	0	24	1
0	30	1	2		0	0	1	1	1	0	30	2
0	31	1	1	1	1	1	1	0	0	0	31	2
0	30	1	2	0	1	1	1	0	1	0	30	2
0	23	1	1	0	0	0	1	0	1	0	23	2
0	22	1	1	0	1	1	1	0	1	0	22	1
1	2	1	3	1	1	1	0	1	0	1	10	3
0	29	1	1	0	1	0	0	0	0	0	29	1
0	31	1	1	0	0	0	1	0	1	0	31	2
0	23	1	1	0	0	0	1	0	0	0	23	1
0	32	1	1	0	1	1	1	0	1	0	32	1
0	24	1	1	1	1	1	1	0	1	0	24	2
1	3	1	2	1	0	1	1	1	1	0	26	2
0	28	1	1	0	1	1	0	1	1	0	28	2
0	31	1	1	1	0	0	1	1	1	0	31	3
0	12	1	1	0	0	0	0	0	1	0	12	2
0	28	1	1	0	0	0	1	0	1	0	28	1
0	31	1	1	0	0	0	1	0		0	31	2
0	25	1	1	0	1	1	1	1	1	0	25	1
0	24	1	1	0	1	1	1	0	1	0	24	1
0	30	1	1	0	1	1	1	0	0	0	30	1
0	30	1	1		1	0	1	0	1	0	30	2
0	23	1	1	0	0	0	1	0	0	0	23	2
0	30	1	1	0	0	0	1	0	0	0	30	1
0	30	1	1	0	1	1	1	0	0	0	30	1
0	30	1	2		1	0	1	1	0	0	30	3
0	24	1	1	0	0	0	1	0	0	0	24	1
0	30	1	1	1	0	1	1	1	1	0	30	2
0	30	1	2	1	0	0	1	1	1	0	30	3
0	23	1	2	0	1	1	1	1	1	0	23	2
0	23	1	1	0	1	1	1	0	1	0	23	2
0	24	1	1	0	1	1	1	0	1	0	24	2
0	21	1	2	0	1	1	1	1	1	0	21	1
0	30	1	1	0	0	0	1	0	1	0	30	3
0	29	1	2	0	0	0	1	1	0	0	29	3
0	23	1	1	0	1	0	0	0	0	0	23	1
0	24	1	1	1	1	1	1	1	1	0	24	3
0	23	1	2	1	0	0	1	1	1	0	23	2
0	28	1	1	0	1	1	1	0	1	0	28	2
0	29	1	1		1	0	1	1	0	0	29	1
0	23	1	2	1	1	1	1	1	1	0	23	3
0	24	1	1	0	0	0	1	1	0	0	24	3
0	26	1	1		1	0	1	1	1	0	26	2
1	1	1	2	1	0	0	0	0		0	27	2
0	24	1	1		1	1	1	0	0	0	24	2
0	21	1	2	1	0	0	1	1	1	0	21	2
0	23	1	1		1	1	0	0	1	0	23	1
0	27	1	1		1	1	1	0	0	0	27	2
1	18	1	2	0	0	0	1	1	0	0	28	3
0	25	1	1	0	0	0	1	0	1	0	25	1
0	24	1	1	0	1	0	1	0	1	0	24	1
0	20	1	2		0	0	0	1	1	0	20	2
0	28	1	1	0	1	0	1	0	0	0	28	2
0	27	1	1	0	1	1	1	0	1	0	27	1
0	22	1	2	0	1	1	1	1	1	0	22	1
0	25	1	1	0	0	0	0	0	1	0	25	2
0	23	1	1	0	0	0	1	0	1	0	23	2
0	25	1	1	0	0	0	1	0	0	0	25	2
0	27	1	2	1	0	0	1	1	0	0	27	2
0	24	1	1	0	1	0	0	0	0	0	24	1
0	25	1	1	0	1	1	0	0	0	0	25	1
0	26	1	2	1	0	0	1	1	0	0	26	2
0	22	1	3	0	1	1	1	1	1	0	22	1
0	27	1	2	0	0	0	1	1	0	0	27	3
0	26	1	1	1	1	1	1	1	1	0	26	2
0	26	1	1	0	1	1	1	0	1	0	26	2
0	24	1	1	0	0	0	0	0	0	0	24	1
0	26	1	2	0	1	1	1	0	1	0	26	2
0	24	2	2	0	0	0	1	1	0	0	24	1
0	23	1	1	0	0	0	1	0	1	0	23	1
0	25	1	1	0	1	1	1	0	0	0	25	2
0	23	1	1	0	1	1	0	0	0	0	23	1
0	25	1	1	0	1	1	1	0	1	0	25	2
0	24	1	1	0	0	0	1	0	1	0	24	2
0	24	1	1	0	0	0	1	0	1	0	24	2
0	10	2	2	0	1	1	1	0	0	0	10	1
0	1	1	2	1	1	1	1	1	1	0	1	3
0	24	1	1	0	0	0	1	0	0	0	24	2
0	25	1	1	0	1	1	1	0	1	0	25	3
0	24	1	1	0	1	1	1	0	1	0	24	1
0	30	1	1	0	1	1	0	0	0	0	30	2
0	30	1	1	0	0	0	0	0	0	0	30	1
0	24	1	1	0	0	0	0	0	0	0	24
0	23	1	1	0	0	0	1	0	1	0	23	1
0	23	1	1		1	1	1	0	0	0	23	2
0	29	1	3		1	1	1	0	0	0	29	2
0	24	1	1	0	1	0	1	0	1	0	24	1
0	25	2	2	0	1	1	1	0	0	0	25	2
0	26	1	2	1	1	1	1	1	1	0	26	2
0	25	1	2	1	0	0	1	1	1	0	25	2
0	28	1	2		0	0	1	0	0	0	28	3
0	28	1	2	1	0	0	1	1	0	0	28	2
0	28	1	1	0	0	0	1	0	0	0	28	2
0	24	1	1	0	0	0	1	0	0	0	24	1
0	27	1	1	0	1	1	1	0	1	0	27	2
0	28	1	2	0	1	1	1	0	0	0	28	2
0	27	1	1	0	1	1	0	0	1	0	27	1
0	27	1	1		1	0	1	1	1	0	27	1
0	25	1	1	0	1	1	0	0	0	0	25	1
0	28	1	1	0	1	1	1	0	1	0	28	1
0	24	1	1	1	0	0	1	1	1	0	24	2
0	25	1	1	0	0	0	0	0	0	0	25	2
0	27	1	1	0	1	1	1	0	0	0	27	1
0	25	1	1	0	0	0	0	0	1	0	25	2
0	27	1	1	1	1	1	1	0	0	0	27	2
0	26	1	1	0	1	1	1	0	1	0	26	2
0	28	1	1		0	0	1	1	1	0	28	3
0	23	1	1	0	0	0	1	0	1	0	23	2
0	25	1	1	1	1	1	1	1	1	0	25	1
0	24	1	1	0	0	0	1	0	1	0	24	1
0	26	1	1	0	0	0	1	0	0	0	26	2
0	24	2	2	1	0	0	1	1	1	0	24	1
0	25	1	1	0	1	1	0	0	0	0	25	1
0	26	1	1	0	1	1	1	0	0	0	26	2
0	27	1	1	0	0	0	1	0	1	0	27	2
0	24	1	1	0	1	1	0	0	0	0	24	1
0	24	1	1		1	1	1	1	0	0	24	3
0	23	1	1	0	0	0	1	0	0	0	23	2
0	24	1	1	0	1	1	0	0	0	0	24	1
0	26	2	1	1	0	0	1	1	0	0	26	1
0	26	1	1	1	0	0	1	0	1	0	26	1
0	26	1	1	0	1	0	1	0	0	0	26	1
0	22	1	1	0	1	1	0	0	0	0	22	3
0	26	1	1	0	1	1	0	1	0	0	26	3
0	23	1	1	1	1	1	1	1	1	0	23	2
0	24	1	3	1	1	1	1	1	1	0	24	2
0	27	1	1	1	1	1	1	0	1	0	27	1
0	24	1	1	0	1	0	1	0	1	0	24	1
0	24	1	1	0	1	1	1	0	1	0	24	1
0	23	2	1	0	0	0	1	0	0	0	23	2
0	23	1	1	0	0	0	1	1	1	0	23	3
0	26	1	1	0	1	0	1	1	1	0	26	3
0	23	1	1	0	0	0	1	0	1	0	23	2
0	23	1	1	0	1	1	1	0	1	0	23	1
0	23	1	2	1	0	0	1	0	0	0	23	1
0	23	1	2	0	0	0	1	1	1	0	23	3
0	26	1	1	0	1	1	1	0	1	0	26	1
0	23	1	1	0	0	0	0	0	0	0	23	1
0	24	1	1	0	0	0	1	0	1	0	24	1
0	25	1	1		0	0	1	0	1	0	25	3
0	23	1	1	0	1	1	0	0	0	0	23	2
0	23	2	1	0	1	1	1	0	1	0	23	1
0	30	1	1	0	1	1	1	0	1	0	30	1
0	23	1	1	0	0	1	1	0	1	0	23	1
0	23	1	1	0	1	1	1	0	0	0	23	2
0	31	1	1	0	0	0	1	0	1	0	31	1
0	25	1	1		1	0	1	0	0	0	25	2
0	28	1	2	0	1	1	1	0	0	0	28	2
0	23	1	1		1	1	0	0	1	0	23	1
0	29	1	3	1	1	1	1	1	1	0	29	3
0	26	1	1	1	1	1	1	0	1	0	26	2
0	35	1	1	0	1	1	1	0	0	0	35	2
0	24	1	1	0	0	0	1	0	1	0	24	2
0	30	1	1	0	0	0	1	1	0	0	30	2
0	36	1	1	0	0	0	1	0	0	0	36	2
0	19	1	1	1	1	1	1	1	0	0	19	1
0	18	1	1	0	0	0	1	1	0	0	18	2
0	19	1	2	0	1	1	1	1	0	0	19	3
0	11	1	3	1	0	0	1	1	1	0	11	1
0	18	1	1	0	1	1	1	0	0	0	18	2
0	17	1	1	0	1	1	1	0	1	0	17	1
0	12	2	1	0	1	1	1	0	1	0	12	1
0	18	1	1	0	1	1	1	0	1	0	18	1
1	24	1	3	1	1		1	1	1	0	24	3
0	19	1	2	1	0	0	1	1	0	0	19	3
0	22	1	1	0	0	0	0	0	0	0	22	2
0	17	1	1	0	1	1	0	0	1	0	17	2
0	19	1	1	1	0	0	1	0	0	0	19	2
0	22	1	1	1	0	0	1	1	0	0	22	2
0	18	1	2	0	1	1	1	0	1	0	18	1
0	19	1	2	1	0	0	1	1	1	0	19	1
0	11	1	1	0	1	1	0	0	1	0	11	1
0	18	1	1	0	1	0	1	0	1	0	18	2
0	17	2	1	0	1	1	1	0	1	0	17	1
1	7	1	2	1	1	0	0	1	1	1	18	3
0	17	1	1	1	1	1	1	0	0	0	17	1
0	17	1	2	1	1	1	0	1	1	0	17	3
0	11	1	1	0	1	0	1	0	1	0	11	3
0	17	1	1	1	1	1	1	0	1	0	17	2
0	11	1	1	0	1	0	0	0	0	0	11	1
0	11	1	1	1	0	0	1	1	1	0	11	3
0	18	2	2	0	1	0	1	0	0	0	18	1
0	18	1	2	0	1	1	1	0	0	0	18	3
0	12	1	1	0	1	1	1	0	0	0	12	2
0	18	1	2		0	0	1	1	0	0	18	3
0	18	1	1		0	0	0	0	0	0	18	1
0	15	1	2	1	0	1	0	1	1	0	15	3
0	17	1	2	1	1	1	1	1	1	0	17	2
0	16	1	3	1	1	1	1	1	1	0	16	2
0	12	1	1	0	1	1	1	0	0	0	12	1
0	11	1	1	0	1	1	0	0	1	0	11	1
0	16	1	1	1	1	1	1	0	1	0	16	1
0	12	1	1	0	0	0	0	0	1	0	12	1
0	17	2	2	0	1	1	1	0	0	0	17	1
0	17	1	1	0	1	1	1	0	1	0	17	1
0	18	1	2	0	0	0	1	0	0	0	18	1
0	16	1	1	0	0	0	0	0	0	0	16	1
0	16	1	1	0	1	1	0	1	0	0	16	3
0	12	1	1	0	0	0	0	0	1	0	12	2
0	16	1	2	1	0	0	1	0	1	0	16	3
0	16	1	1	0	1	1	0	1	0	0	16	3
0	18	1	1	1	1	1	1	0	1	0	18	2
0	15	1	1	0	1	1	1	0	1	0	15	2
0	12	1	1	1	0	0	1	0	0	0	12	2
0	17	1	1	1	0	0	1	1	0	0	17	2
0	15	1	1		0	0	1	0	0	0	15	2
0	14	1	2	1	1	1	1	0	0	0	14	1
0	11	1	1	0	1	0	1	0	1	0	11	1
0	17	1	1	0	0	0	0	0	0	0	17	2
0	16	1	1	0	0	0	1	0	1	0	16	1
0	17	1	2	1	0	0	1	1	1	0	17	2
0	15	1	2	1	0	0	1	1	1	0	15	2
0	14	1	1	0	1	1	1	0	0	0	14	1
0	15	1	1		0	0	1	0	0	0	15	2
0	12	1	1	0	1	1	1	0	1	0	12	2
0	16	1	2	1	0	0	1	1	0	0	16	3
0	17	1	1	0	1	1	0	0	0	0	17	2
0	16	1	1	1	0	0	1	1	1	0	16	3
0	15	1	1	1	0	0	1	0	0	0	15	1
0	22	1	1	0	0	0	0	0	0	0	22	1
0	12	1	1	0	1	1	1	0	1	0	12	2
0	15	1	1	0	1	1	1	0	1	0	15	2
0	16	1	1	0	0	0	1	0	1	0	16	1
0	13	1	2	1	0	0	0	1	0	0	13	3
0	15	1	2	1	1	1	1	1	0	0	15	3
0	16	1	1	0	1	1	1	0	0	0	16	1
0	14	2	1	0	1	1	1	0	0	0	14	2
0	14	1	1	0	1	1	0	0	0	0	14	2
0	15	1	1	0	0	0	1	0	1	0	15	2
0	21	1	1	0	0	0	1	0	1	0	21	1
0	11	1	1	0	1	1	1	0	0	0	11	3
0	18	1	1	0	0	0	1	0	1	0	18	2
1	10	1	3	1	0	1	1	1	1	0	16	2
0	15	1	2	0	0	0	1	0	1	0	15	2
0	10	1	1	0	1	0	1	0	1	0	10	2
0	14	1	1	0	0	0	0	0	0	0	14	2
0	11	1	1	0	1	1	0	0	1	0	11	1
0	15	1	1	0	1	1	1	0	1	0	15	2
0	14	1	1	0	1	1	1	0	1	0	14	1
0	11	1	1	0	1	1	0	0	1	0	11	2
0	13	1	1	1	1	1	1	0	1	0	13	2
0	15	1	2	0	1	1	1	0	1	0	15	2
0	15	1	1	1	0	0	1	0	1	0	15	2
0	15	1	2	0	0	0	1	1	0	0	15	2
0	11	2	2	1	0	0	1	1	0	0	11	1
0	15	1	2	1	0	0	1	1	0	0	15	3
0	12	1	1	0	0	0	0	0	1	0	12	2
0	11	1	1	0	1	1	0	0	0	0	11	1
0	12	1	1	0	1	1	1	0	1	0	12	2
0	11	1	2	1	0	0	1	1	1	0	11	2
0	13	1	2	1	1	1	1	1	1	0	13	2
0	12	1	1	0	1	1	1	0	0	0	12	2
0	12	1	1	0	0	0	1	0	1	0	12	2
0	13	1	1	0	0	0	1	0	0	0	13	1
0	14	1	2	1	1	1	1	0	0	0	14	2
0	15	1	2	1	0	0	1	0	1	0	15	2
0	15	1	1	1	0	0	1	1	1	0	15	2
0	14	1	2	1	0	0	1	1	0	0	14	2
0	13	1	1	0	0	0	0	0	1	0	13	2
0	14	1	1	1	0	0	1	1	1	0	14	2
0	13	1	1	0	0	0	1	0	0	0	13	3
0	12	1	1	0	0	0	1	0	1	0	12	1
0	13	2	1	0	1	1	1	0	0	0	13	1
0	13	1	1	1	1	1	1	1	0	0	13	2
0	14	1	1	0	0	0	1	0	1	0	14	2
0	10	1	1	0	1	1	1	0	0	0	10	2
0	14	2	1	1	0	0	1	1	0	0	14	1
0	13	1	1	1	0	0	1	0	0	0	13	2
0	8	1	1	1	0	0	1	1	1	0	8	3
0	12	1	1	0	0	0	1	1	0	0	12	2
0	12	1	1	0	1	0	1	0	1	0	12	1
0	12	1	1	0	1	1	1	0	1	0	12	2
0	11	1	1		1	1	1	0	1	0	11	2
0	13	1	1	0	0	0	1	0	1	0	13	2
0	11	1	1	0	1	1	1	0	1	0	11	3
0	12	1	2	0	0	0	1	1	1	0	12	3
0	10	1	2	1	1	1	1	0	0	0	10	2
0	9	1	1	0	0	0	1	0	1	0	9	2
0	16	1	1	0	1	1	1	0	1	0	16	1
0	13	1	1	0	0	0	1	1	0	0	13	3
0	12	1	1	1	0	0	1	0	0	0	12	1
0	12	1	1	0	0	1	1	0	0	0	12	2
0	13	1	1	0	1	0	1	0	0	0	13	1
0	12	1	1		1	1	1	0	1	0	12	1
0	11	1	1	1	1	1	1	1	1	0	11	2
0	12	1	1		0	0	1	0	1	0	12	1
0	12	1	2	1	0	0	1	0	1	0	12	2
0	12	1	1		1	1	1	0	1	0	12	1
0	10	1	1	0	0	0	1	0	0	0	10	1
0	9	1	2		1	1	1	1	1	0	9	1
0	10	1	1	0	1	1	1	0	0	0	10	2
0	10	1	2	1	0	0	1	1	1	0	10	3
0	12	1	1	0	1	1	1	0	0	0	12	2
0	10	1	1	0	0	0	1	0	0	0	10	1
0	13	1	3	1	1	1	1	1	1	0	13	1
0	11	1	2	0	1	1	1	0	1	0	11	2
0	10	1	1	0	1	1	1	0	1	0	10	2
0	11	1	1	0	1	1	1	0	1	0	11	1
0	9	1	1	0	1	1	1	0	1	0	9	2
0	11	1	2		0	0	1	1	0	0	11	2
0	9	1	1	0	0	0	1	0	0	0	9	2
0	11	1	1	0	1	0	1	0	1	0	11	1
0	11	1	1	0	0	1	1	0	1	0	11	2
0	9	2	2	0	1	0	1	0	0	0	9	1
0	9	1	1	0	0	0	1	0	1	0	9	1
0	10	1	2	0	0	0	1	1	0	0	10	2
0	10	2	1	0	1	1	1	0	0	0	10	1
0	10	1	1	0	1	1	1	0	1	0	10	2
0	10	1	1	0	0	0	1	0	0	0	10	1
0	0	1	2	0	1	1	1	0	0	0	0	1
0	10	2	1	1	1	1	1	1	1	0	10	2
0	8	1	1	0	1	1	1	0	1	0	8	2
0	9	1	1	0	1	1	1	1	1	0	9	1
0	5	1	1	0	1	1	1	0	0	0	5	2
0	9	1	1	0	1	1	1	0	1	0	9	2
0	9	1	2	1	1	1	1	0	1	0	9	2
0	5	1	1	0	1	1	1	0	1	0	5	1
0	9	1	1	0	1	1	0	0	1	0	9	1
0	5	1	1	0	1	1	0	0	0	0	5	1
0	8	1	1	1	1	0	1	1	0	0	8	3
0	8	1	1	1	1	1	1	0	1	0	8	2
0	8	1	2	1	1	1	1	0	0	0	8	3
0	6	1	1	0	1	1	0	0	0	0	6	1
0	9	1	2		1	1	1	0	0	0	9	1
0	9	1	2	0	0	0	1	1	1	0	9	2
0	9	1	3	1	0	0	0	1	0	0	9	3
0	8	1	1	0	0	0	1	0	0	0	8	2
0	5	1	1	0	1	1	0	0	1	0	5	1
0	11	1	2	0	0	0	1	1	1	0	11	2
0	6	1	1	0	1	1	1	0	0	0	6	2
0	9	1	2	1	0	0	1	1	1	0	9	2
1	7	1	1	0	1	0	1	0	1	0	9	2
0	5	1	2	0	1	1	1	0	1	0	5	1
0	5	1	2	1	1	1	0	1	0	0	5	3
0	7	1	1	0	1	1	1	0	0	0	7	2
0	5	1	1	0	0	0	1	0	1	0	5	1
0	8	1	1	0	0	0	1	0	0	0	8	1
0	8	1	1	1	0	0	1	0	1	0	8	2
0	7	1	1	0	1	1	1	0	1	0	7	1
0	8	1	1	0	0	0	1	0	1	0	8	1
0	9	1	2	1	1	1	1	1	1	0	9	2
0	7	1	1	0	1	1	1	0	1	0	7	1
0	8	1	2		0	0	1	0	0	0	8	2
0	9	1	1	1	1	1	1	0	1	0	9	1
0	8	1	2	1	1	1	1	0	1	0	8	2
0	8	1	1	0	1	1	1	0	1	0	8	3
0	8	1	1	0	0	0	1	0	0	0	8	1
0	8	1	1	0	0	0	1	0	1	0	8	1
